# Supplementary material
Source: PubMed Central journal article supplement (PMC5613275)
Supplement: mp500334z_si_001.pdf [file mp500334z_si_001.pdf]

Insights into Hydrate Formation and Stability of  
Morphinanes from a Combination of Experimental and  
Computational Approaches

*Doris E. Braun, Thomas Gelbrich, Volker Kahlenberg and Ulrich J. Griesser*

**Electronic Supporting Information**

## Contents of Supporting Information

|           |                                                                                         |           |
|-----------|-----------------------------------------------------------------------------------------|-----------|
| <b>A)</b> | <b>Experimental</b> .....                                                               | <b>3</b>  |
| 1.        | <b>Nomenclature (Abbreviations)</b> .....                                               | <b>3</b>  |
| 2.        | <b>Crystallization Experiments</b> .....                                                | <b>4</b>  |
| 2.1.      | Morphine (M).....                                                                       | 4         |
| 2.2.      | Morphine Hydrochloride (MCl).....                                                       | 4         |
| 2.3.      | Codeine (C).....                                                                        | 5         |
| 2.4.      | Codeine Hydrochloride (CCl).....                                                        | 5         |
| 2.5.      | Ethylmorphine (D) .....                                                                 | 6         |
| 2.6.      | Ethylmorphine Hydrochloride (DCI) .....                                                 | 6         |
| 3.        | <b>Gravimetric Moisture Sorption/Desorption Analysis (GMS)</b> .....                    | <b>8</b>  |
| 4.        | <b>Determination and Analysis of Crystal Structures</b> .....                           | <b>11</b> |
| 4.1.      | Crystallographic Data.....                                                              | 11        |
| 4.2.      | Treatment of H Atoms .....                                                              | 12        |
| 4.3.      | <i>XPac</i> Comparison of Experimental Crystal Structures .....                         | 12        |
| 4.3.1.    | General.....                                                                            | 12        |
| 4.3.2.    | Subset: DCI-2H, CCl-2H MCl-3H, D-1H and C-1H.....                                       | 13        |
| 4.3.3.    | Subset: MCl-I <sup>o</sup> , CCl-I <sup>o</sup> and M-1H .....                          | 13        |
| 4.3.4.    | Subset: C and M-I <sup>o</sup> .....                                                    | 14        |
| 4.4.      | Geometry of Classical Hydrogen Bonds .....                                              | 15        |
| 4.5.      | Packing Diagrams .....                                                                  | 17        |
| 5.        | <b>Powder X-ray Diffraction</b> .....                                                   | <b>19</b> |
| 6.        | <b>Hot-stage Microscopy</b> .....                                                       | <b>21</b> |
| 7.        | <b>Morphine (M): Differential Scanning Calorimetry + Powder X-ray Diffraction</b> ..... | <b>22</b> |
| 8.        | <b>Ethylmorphine (D): Infrared Spectroscopy</b> .....                                   | <b>23</b> |
| 9.        | <b>Transformation Schemes</b> .....                                                     | <b>24</b> |
| 9.1.      | Morphine (M).....                                                                       | 24        |
| 9.2.      | Codeine (C).....                                                                        | 24        |
| 9.3.      | Ethylmorphine (D) .....                                                                 | 24        |
| 9.4.      | Morphine HCl (MCl).....                                                                 | 25        |
| 9.5.      | Codeine HCl (CCl).....                                                                  | 25        |
| 9.6.      | Ethylmorphine HCl (DCI) .....                                                           | 25        |
| <b>B)</b> | <b>Computational</b> .....                                                              | <b>26</b> |
| 10.       | <b>Conformational Analysis of Morphine (M), Codeine (C) and Ethylmorphine (D)</b> ..... | <b>26</b> |
| 10.1.     | Morphine (M) .....                                                                      | 26        |
| 10.2.     | Codeine (C).....                                                                        | 27        |
| 10.3.     | Ethylmorphine (D) .....                                                                 | 28        |
| 11.       | <b>Periodic Electronic Structure Calculations (DFT-D): Modelling Details</b> .....      | <b>30</b> |
| 12.       | <b>Representation of the Experimental Structures</b> .....                              | <b>31</b> |
| 13.       | <b>Computational Dehydration</b> .....                                                  | <b>35</b> |
| 14.       | <b>Void space analysis</b> .....                                                        | <b>37</b> |
| 15.       | <b>Computationally Generated D-I<sup>o</sup> Structure</b> .....                        | <b>38</b> |
| 16.       | <b>Computationally Generated MCl-2H</b> .....                                           | <b>39</b> |

## A) Experimental

### 1. Nomenclature (Abbreviations)

Crystalline forms of the six investigated morphinanes were named as follows:

|                              |                                                        |
|------------------------------|--------------------------------------------------------|
| <b>M</b>                     | Morphine                                               |
| <b>C</b>                     | Codeine                                                |
| <b>D</b>                     | Ethylmorphine (Dionine)                                |
| <i>Cl</i>                    | Hydrochloride                                          |
| I°, II, III                  | Anhydrate form I°, II, III                             |
| °                            | Thermodynamic room temperature form                    |
| 1H                           | Monohydrate                                            |
| 2H                           | Dihydrate                                              |
| 3H                           | Trihydrate                                             |
| calc                         | Calculated structure                                   |
| Examples:                    |                                                        |
| <b>MCl-3H<sub>calc</sub></b> | Calculated morphine hydrochloride trihydrate structure |
| <b>C-I°</b>                  | Codeine anhydrate form I°                              |

## 2. Crystallization Experiments

8-10 mg of compound were used for each of the evaporation, cooling crystallization or vapor diffusion experiments. The used solvents were all of analytical quality and all organic solvents were purchased from Aldrich or Fluka. The crystallization products were analysed with (hot-stage) microscopy, differential scanning calorimetry, thermogravimetric analysis, IR spectroscopy and powder X-ray diffractometry.

Evaporation experiments (EV): A saturated solution (at RT) of the compound was filtered and the solvent was evaporated from a watch glass at RT.

Cooling crystallization experiments (CC): A hot saturated solution of the compound (close to the boiling point of each solvent) was either cooled fast to 4 °C or slowly (test tube wrapped in aluminum foil) to room temperature.

Vapor diffusion experiments (VD): A saturated solution of the compound at RT was placed in a small vial, which was placed upright in a larger closed vial in which a quantity of anti-solvent had been added.

### 2.1. Morphine (M)

**Table S1.** Results of morphine crystallization experiments (**M-1H** – monohydrate).

| Solvent | Fast CC     | Slow CC     |
|---------|-------------|-------------|
| Ethanol | <b>M-1H</b> | <b>M-1H</b> |
| Water   | <b>M-1H</b> | <b>M-1H</b> |

### 2.2. Morphine Hydrochloride (MCl)

**Table S2.** Results of morphine hydrochloride crystallization experiments (**MCl-3H** – trihydrate).

| Solvent | Fast CC       | Slow CC       |
|---------|---------------|---------------|
| Ethanol | <b>MCl-3H</b> | <b>MCl-3H</b> |
| Water   | <b>MCl-3H</b> | <b>MCl-3H</b> |

### 2.3. Codeine (C)

**Table S3.** Results of codeine evaporation experiments (C-I° – anhydrate form I°, C-1H – monohydrate).

| Solvent      | Solid Form | Solvent            | Solid Form |
|--------------|------------|--------------------|------------|
| Methanol     | C-I°       | Chloroform         | C-I°       |
| Ethanol      | C-I°       | Dichloromethane    | C-I°       |
| 1-Propanol   | C-I°       | Ethyl acetate      | C-I°       |
| 2-Propanol   | C-I°       | 1,4-Dioxane        | C-I°       |
| 2-Butanol    | C-I°       | Dimethyl sulfoxide | C-I°       |
| t-Penanol    | C-I°       | Dimethyl formamide | C-I°       |
| Acetone      | C-I°       | Tetrahydrofuran    | C-I°       |
| Acetonitrile | C-I°       | Toluene            | C-I°       |
| Nitromethane | C-I°       | Water              | C-1H       |

**Table S4.** Results of codeine crystallization experiments (C-I° – anhydrate form I°, C-1H – monohydrate).

| Solvent              | Fast CC | Slow CC |
|----------------------|---------|---------|
| Methanol             | C-I°    | C-I°    |
| Ethanol              | C-I°    | C-I°    |
| Water                | C-1H    | C-1H    |
| Methanol:Water (1:1) | C-1H    | C-1H    |

**Table S5.** Results of codeine vapor diffusion experiments (C-I° – anhydrate form I°).

| Solvent         | Anit-solvent | Solid form |
|-----------------|--------------|------------|
| Dichloromethane | 2-Pentane    | C-I°       |

### 2.4. Codeine Hydrochloride (CCI)

**Table S6.** Results of codeine HCl crystallization experiments (CCI-I° – anhydrate form I°, CCI-2H – dihydrate).

| Solvent             | Fast CC | Slow CC |
|---------------------|---------|---------|
| Methanol            | CCI-2H  | CCI-2H  |
| Ethanol             | CCI-2H  | CCI-2H  |
| 2-Propanol          | CCI-I°  | CCI-2H  |
| 1-Butanol           | CCI-I°  | CCI-I°  |
| 2-Butanol           | CCI-I°  | CCI-2H  |
| 1-Pentanol          | CCI-I°  | CCI-I°  |
| t-Pentanol          | CCI-I°  | CCI-I°  |
| Acetone:Water (1:1) | CCI-2H  | CCI-2H  |
| Acetonitrile        | CCI-I°  | CCI-I°  |
| Ethyl acetate       | CCI-2H  | CCI-2H  |
| Ethyl methyl ketone | CCI-I°  | CCI-I°  |
| 1,4-Dioxane         | CCI-2H  | CCI-2H  |
| Dimethyl formamide  | CCI-I°  | CCI-I°  |
| Dimethyl sulfoxide  | CCI-I°  | CCI-I°  |

**Table S7.** Results of codeine HCl vapor diffusion experiments (**CCI-2H** – dihydrate).

| Solvent         | Anit-solvent | Solid form    |
|-----------------|--------------|---------------|
| Dichloromethane | 2-Pentane    | <b>CCI-2H</b> |

**2.5. Ethylmorphine (D)****Table S8.** Results of ethylmorphine crystallization experiments (**D-1H** – monohydrate).

| Solvent             | Fast CC     | Slow CC     |
|---------------------|-------------|-------------|
| Methanol            | <b>D-1H</b> | <b>D-1H</b> |
| Ethanol             | <b>D-1H</b> | <b>D-1H</b> |
| 2-Propanol          | <b>D-1H</b> | <b>D-1H</b> |
| 1-Butanol           | <b>D-1H</b> | <b>D-1H</b> |
| t-Pentanol          | <b>D-1H</b> | <b>D-1H</b> |
| Acetone             | <b>D-1H</b> | <b>D-1H</b> |
| Acetonitrile        | <b>D-1H</b> | <b>D-1H</b> |
| Dichloromethane     | <b>D-1H</b> | <b>D-1H</b> |
| Chloroform          | <b>D-1H</b> | <b>D-1H</b> |
| Cyclohexanone       | <b>D-1H</b> | <b>D-1H</b> |
| Methyl acetate      | <b>D-1H</b> | <b>D-1H</b> |
| Ethyl acetate       | <b>D-1H</b> | <b>D-1H</b> |
| Ethyl methyl ketone | <b>D-1H</b> | <b>D-1H</b> |
| 1,4-Dioxane         | <b>D-1H</b> | <b>D-1H</b> |
| Dimethyl formamide  | <b>D-1H</b> | <b>D-1H</b> |
| Dimethyl sulfoxide  | <b>D-1H</b> | <b>D-1H</b> |
| Nitromethane        | <b>D-1H</b> | <b>D-1H</b> |
| Pyridine            | <b>D-1H</b> | <b>D-1H</b> |
| Glycerol            | <b>D-1H</b> | <b>D-1H</b> |
| Water               | <b>D-1H</b> | <b>D-1H</b> |

**Table S9.** Results of ethylmorphine vapor diffusion experiments (**D-1H** – monohydrate).

| Solvent         | Anit-solvent | Solid form  |
|-----------------|--------------|-------------|
| Dichloromethane | 2-Pentane    | <b>D-1H</b> |
| Dichloroethane  | 2-Pentane    | <b>D-1H</b> |

**2.6. Ethylmorphine Hydrochloride (DCI)****Table S10.** Results of ethylmorphine HCl evaporation experiments (**DCI-2H** – dihydrate).

| Solvent      | Solid Form                | Solvent            | Solid Form                |
|--------------|---------------------------|--------------------|---------------------------|
| Methanol     | amorphous                 | Dioxane            | amorphous                 |
| Ethanol      | amorphous > <b>DCI-2H</b> | Dimethyl formamide | amorphous                 |
| 2-Propanol   | amorphous + <b>DCI-2H</b> | Dimethyl sulfoxide | amorphous                 |
| Water        | <b>DCI-2H</b> > amorphous | Nitromethane       | amorphous > <b>DCI-2H</b> |
| Acetone      | amorphous > <b>DCI-2H</b> | Tetrahydrofurane   | amorphous                 |
| Acetonitrile | amorphous > <b>DCI-2H</b> | Acetic Acid        | amorphous                 |
| Chloroform   | amorphous + <b>DCI-2H</b> |                    |                           |

**Table S11.** Results of ethylmorphine HCl crystallization experiments (**DCI-2H** – dihydrate).

| Solvent             | Fast CC       | Slow CC       |
|---------------------|---------------|---------------|
| Methanol            | <b>DCI-2H</b> | <b>DCI-2H</b> |
| Ethanol             | <b>DCI-2H</b> | <b>DCI-2H</b> |
| 2-Propanol          | <b>DCI-2H</b> | <b>DCI-2H</b> |
| 1-Butanol           | <b>DCI-2H</b> | <b>DCI-2H</b> |
| 2-Butanol           | <b>DCI-2H</b> | <b>DCI-2H</b> |
| t-Pentanol          | <b>DCI-2H</b> | <b>DCI-2H</b> |
| Acetone             | <b>DCI-2H</b> | <b>DCI-2H</b> |
| Acetonitrile        | <b>DCI-2H</b> | <b>DCI-2H</b> |
| Chloroform          | amorphous     | amorphous     |
| Ethyl acetate       | <b>DCI-2H</b> | <b>DCI-2H</b> |
| Ethyl methyl ketone | <b>DCI-2H</b> | <b>DCI-2H</b> |
| Toluene             | <b>DCI-2H</b> | <b>DCI-2H</b> |
| Water               | <b>DCI-2H</b> | <b>DCI-2H</b> |

**Table 12.** Results of ethylmorphine HCl vapor diffusion experiments (**DCI-2H** – dihydrate).

| Solvent         | Anit-solvent | Solid form    |
|-----------------|--------------|---------------|
| Dichloromethane | 2-Pentane    | <b>DCI-2H</b> |
| Dichloroethane  | 2-Pentane    | <b>DCI-2H</b> |

### 3. Gravimetric Moisture Sorption/Desorption Analysis (GMS)

Details of the experimental setup of the gravimetric moisture sorption/desorption studies are given in Table S13. Additional sorption/desorption isotherms are given for **MCl** (Figure S1) and **C** (Figure S2).

**Table S13.** Experimental setup of gravimetric moisture sorption/desorption studies.

| <b>Setup 1 (M, C, D, MCl, CCl, DCI)</b> |                    |                  |                        |                 |
|-----------------------------------------|--------------------|------------------|------------------------|-----------------|
| <b>Cycle Number</b>                     | <b>RH% (start)</b> | <b>RH% (end)</b> | <b>Number of steps</b> | <b>Time (h)</b> |
| 1                                       | 40                 | 30               | 1                      |                 |
| 2                                       | 25                 | 10               | 2                      |                 |
| 3                                       | 9                  | 5                | 4                      |                 |
| 4                                       | 6                  | 10               | 4                      |                 |
| 5                                       | 12                 | 30               | 9                      |                 |
| 6                                       | 35                 | 95               | 12                     |                 |
| 7                                       | 90                 | 50               | 4                      |                 |
| 8                                       | 45                 | 10               | 7                      |                 |
| 9                                       | 5                  | 0                | 1                      | 120             |
| 10                                      | 5                  | 40               | 7                      |                 |
| 11                                      | 50                 | 90               | 4                      |                 |
| 12                                      | 95                 | 90               | 1                      |                 |
| 13                                      | 80                 | 40               | 4                      |                 |
| <b>Setup 2 (M, C, MCl, CCl)</b>         |                    |                  |                        |                 |
| <b>Cycle Number</b>                     | <b>RH% (start)</b> | <b>RH% (end)</b> | <b>Number of steps</b> | <b>Time (h)</b> |
| 1                                       | 0                  | 0                | 1                      | 12              |
| 2                                       | 0                  | 90               | 18                     |                 |
| 3                                       | 95                 | 90               | 1                      |                 |
| 4                                       | 85                 | 0                | 17                     |                 |
| 5                                       | 5                  | 40               | 7                      |                 |
| <b>Setup 3 (M, CCl)</b>                 |                    |                  |                        |                 |
| <b>Cycle Number</b>                     | <b>RH% (start)</b> | <b>RH% (end)</b> | <b>Number of steps</b> | <b>Time (h)</b> |
| 1                                       | 40                 | 0                | 4                      |                 |
| 2                                       | 10                 | 90               | 8                      |                 |
| 3                                       | 80                 | 0                | 8                      |                 |
| 4                                       | 10                 | 40               | 3                      |                 |



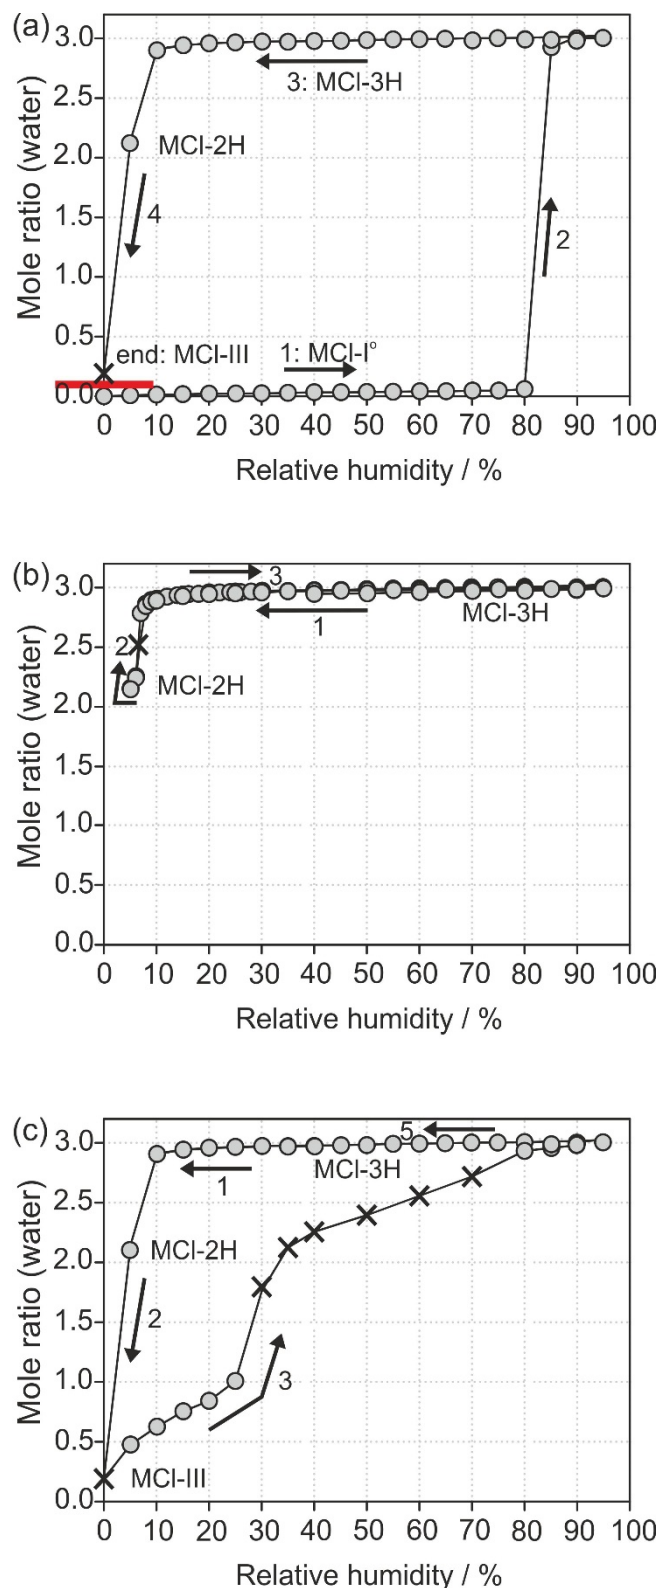

**Figure S1.** Moisture sorption and desorption curves of *MCl* at 25 °C: The grey circles present data points that fulfill the preset equilibrium conditions (see experimental section), whereas the crosses mark measurement values that did not reach the equilibrium within the allowed time limit (48 h). The numbers indicate the order of subsequent sorption (increasing RH) and desorption (decreasing RH) cycles.

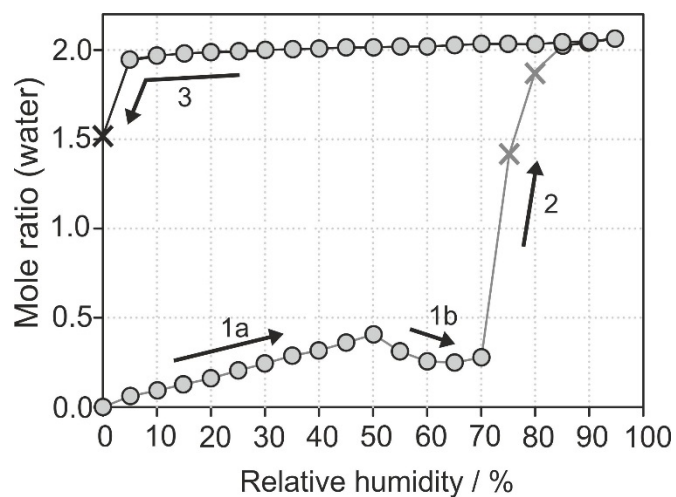

**Figure S2.** Moisture sorption and desorption curves of **C** starting from **C-I°** contaminated with amorphous codeine at 25 °C: The grey circles present data points that fulfill the preset equilibrium conditions (see experimental section), whereas the crosses mark measurement values that did not reach the equilibrium within the allowed time limit (48 h). The numbers indicate the order of subsequent sorption (increasing RH) and desorption (decreasing RH) cycles.

## 4. Determination and Analysis of Crystal Structures

### 4.1. Crystallographic Data

**Table S14.** Crystallographic data and details of crystal structure determinations.

| Phase designator                                                                   | C-1H                                                                | D-1H                                                               | CCI-I <sup>o</sup>                                                             | CCI-2H                                                                                               | DCI-2H                                                                                               |
|------------------------------------------------------------------------------------|---------------------------------------------------------------------|--------------------------------------------------------------------|--------------------------------------------------------------------------------|------------------------------------------------------------------------------------------------------|------------------------------------------------------------------------------------------------------|
| Empirical formula                                                                  | C <sub>18</sub> H <sub>21</sub> NO <sub>3</sub> · H <sub>2</sub> O  | C <sub>19</sub> H <sub>23</sub> NO <sub>3</sub> · H <sub>2</sub> O | C <sub>18</sub> H <sub>22</sub> NO <sub>3</sub> <sup>+</sup> · Cl <sup>-</sup> | C <sub>18</sub> H <sub>22</sub> NO <sub>3</sub> <sup>+</sup> · Cl <sup>-</sup> · 2(H <sub>2</sub> O) | C <sub>19</sub> H <sub>24</sub> NO <sub>3</sub> <sup>+</sup> · Cl <sup>-</sup> · 2(H <sub>2</sub> O) |
| Formula weight                                                                     | 317.37                                                              | 331.40                                                             | 335.82                                                                         | 371.85                                                                                               | 385.87                                                                                               |
| Temperature / K                                                                    | 173(2)                                                              | 173(2)                                                             | 173(2)                                                                         | 123(2)                                                                                               | 123(2)                                                                                               |
| Wavelength / Å                                                                     | Cu Kα                                                               | Mo Kα                                                              | Mo Kα                                                                          | Mo Kα                                                                                                | Cu Kα                                                                                                |
| Crystal size /mm                                                                   | 0.36 × 0.32 × 0.27                                                  | 0.40 × 0.28 × 0.26                                                 | 0.32 × 0.3 × 0.25                                                              | 0.17 × 0.05 × 0.03                                                                                   | 0.14 × 0.04 × 0.02                                                                                   |
| Crystal system                                                                     | orthorhombic                                                        | orthorhombic                                                       | orthorhombic                                                                   | orthorhombic                                                                                         | orthorhombic                                                                                         |
| Space group                                                                        | <i>P</i> 2 <sub>1</sub> 2 <sub>1</sub> 2 <sub>1</sub>               | <i>P</i> 2 <sub>1</sub> 2 <sub>1</sub> 2 <sub>1</sub>              | <i>P</i> 2 <sub>1</sub> 2 <sub>1</sub> 2 <sub>1</sub>                          | <i>P</i> 2 <sub>1</sub> 2 <sub>1</sub> 2 <sub>1</sub>                                                | <i>P</i> 2 <sub>1</sub> 2 <sub>1</sub> 2 <sub>1</sub>                                                |
| <i>a</i> / Å                                                                       | 10.3994(2)                                                          | 7.08246(18)                                                        | 7.14435(17)                                                                    | 6.7621(5)                                                                                            | 6.8715(2)                                                                                            |
| <i>b</i> / Å                                                                       | 12.5671(2)                                                          | 13.1493(3)                                                         | 13.2304(3)                                                                     | 12.9315(9)                                                                                           | 13.3924(4)                                                                                           |
| <i>c</i> / Å                                                                       | 12.0640(2)                                                          | 18.0581(5)                                                         | 16.5408(4)                                                                     | 20.3080(14)                                                                                          | 20.4176(5)                                                                                           |
| Volume/ Å <sup>3</sup>                                                             | 1576.65(5)                                                          | 1681.74(7)                                                         | 1563.48(6)                                                                     | 1775.8(2)                                                                                            | 1878.95(9)                                                                                           |
| Z                                                                                  | 4                                                                   | 4                                                                  | 4                                                                              | 4                                                                                                    | 4                                                                                                    |
| Density (calc)/ g cm <sup>-3</sup>                                                 | 1.337                                                               | 1.309                                                              | 1.427                                                                          | 1.391                                                                                                | 1.364                                                                                                |
| Absorption coefficient                                                             | 0.77                                                                | 0.09                                                               | 0.26                                                                           | 0.24                                                                                                 | 2.06                                                                                                 |
| Absolute structure parameter                                                       | 0.02(8)                                                             | –                                                                  | –0.11(5)                                                                       | –0.01(5)                                                                                             | 0.017(10)                                                                                            |
| Theta range for data collection / °                                                | 5.1 to 67.5                                                         | 3.1 to 26.0                                                        | 3.1 to 26.0                                                                    | 2.55 to 26.0                                                                                         | 5.4 to 67.7                                                                                          |
| Index ranges                                                                       | –12 ≤ <i>h</i> ≤ 12,<br>–14 ≤ <i>k</i> ≤ 15,<br>–14 ≤ <i>l</i> ≤ 14 | –8 ≤ <i>h</i> ≤ 8,<br>–16 ≤ <i>k</i> ≤ 16,<br>–22 ≤ <i>l</i> ≤ 20  | –8 ≤ <i>h</i> ≤ 6<br>–15 ≤ <i>k</i> ≤ 16,<br>–19 ≤ <i>l</i> ≤ 20               | –8 ≤ <i>h</i> ≤ 8,<br>–13 ≤ <i>k</i> ≤ 15,<br>–25 ≤ <i>l</i> ≤ 25                                    | –8 ≤ <i>h</i> ≤ 8,<br>–16 ≤ <i>k</i> ≤ 14,<br>–23 ≤ <i>l</i> ≤ 24                                    |
| No. of measured, independent and observed [ <i>I</i> > 2σ( <i>I</i> )] reflections | 9716/2833/2771                                                      | 11519/3295/3121                                                    | 12628/3062/2897                                                                | 17583/3492/3291                                                                                      | 10707/3360/3153                                                                                      |
| Refinement method                                                                  | Full-matrix least-squares on <i>F</i> <sup>2</sup>                  |                                                                    |                                                                                |                                                                                                      |                                                                                                      |
| Data/ parameters/ restraints                                                       | 2833 / 223 / 2                                                      | 3295 / 232 / 0                                                     | 3062 / 218 / 2                                                                 | 3492 / 272 / 0                                                                                       | 3360 / 259 / 8                                                                                       |
| Goodness-of-fit                                                                    | 1.04                                                                | 1.05                                                               | 1.05                                                                           | 1.03                                                                                                 | 0.98                                                                                                 |
| Final R indices [ <i>I</i> > 2σ( <i>I</i> )]                                       | <i>R</i> 1 = 0.0300,<br><i>wR</i> 2 = 0.0782                        | <i>R</i> 1 = 0.0308,<br><i>wR</i> 2 = 0.0725                       | <i>R</i> 1 = 0.0298,<br><i>wR</i> 2 = 0.0727                                   | <i>R</i> 1 = 0.0257,<br><i>wR</i> 2 = 0.0637                                                         | <i>R</i> 1 = 0.0397,<br><i>wR</i> 2 = 0.1055                                                         |
| R indices (all data)                                                               | <i>R</i> 1 = 0.0307,<br><i>wR</i> 2 = 0.0789                        | <i>R</i> 1 = 0.0334,<br><i>wR</i> 2 = 0.0738                       | <i>R</i> 1 = 0.0320,<br><i>wR</i> 2 = 0.0739                                   | <i>R</i> 1 = 0.0287,<br><i>wR</i> 2 = 0.0647                                                         | <i>R</i> 1 = 0.0431,<br><i>wR</i> 2 = 0.1085                                                         |
| Largest diff. peak and hole                                                        | 0.22, –0.14                                                         | 0.16, –0.15                                                        | 0.24, –0.17                                                                    | 0.22, –0.17                                                                                          | 0.58, –0.25                                                                                          |

## 4.2. Treatment of H Atoms

**Table S15.** Treatment of H atoms (P = refinement of atomic positions; T = refinement of isotropic thermal displacement parameters,  $U_{iso}$ ; m = morphinane; re = distance restraints; F = free refinement)

| H-position(s)         | C-1H                                                       | D-1H                                     | CCI-1°                                   | CCI-2H               | DCI-2H                                                                  |
|-----------------------|------------------------------------------------------------|------------------------------------------|------------------------------------------|----------------------|-------------------------------------------------------------------------|
| -CH, -CH <sub>2</sub> | <b>P</b> riding model<br><b>T</b> $U_{iso} = 1.2U_{eq}(C)$ | riding model<br>$U_{iso} = 1.2U_{eq}(C)$ | riding model<br>$U_{iso} = 1.2U_{eq}(C)$ | riding model<br>free | riding model<br>$U_{iso} = 1.2U_{eq}(C)$                                |
| -CH <sub>3</sub>      | <b>P</b> riding model<br><b>T</b> $U_{iso} = 1.5U_{eq}(C)$ | riding model<br>$U_{iso} = 1.5U_{eq}(C)$ | riding model<br>$U_{iso} = 1.5U_{eq}(C)$ | riding model<br>free | riding model<br>$U_{iso} = 1.5U_{eq}(C)$                                |
| -OH (m)               | <b>P</b> R: O-H = 0.82(2) Å<br><b>T</b> F                  | free<br>free                             | re: N-H = 0.82(2) Å<br>free              | free<br>free         | riding model<br>$U_{iso} = 1.5U_{eq}(O)$                                |
| H <sub>2</sub> O      | <b>P</b> R: O-H = 0.82(2) Å<br><b>T</b> F                  | free<br>free                             | -<br>-                                   | free<br>free         | re: O-H = 0.86(2) Å <sup>a</sup><br>free /<br>$U_{iso} = 1.2 U_{eq}(O)$ |
| -NH                   | <b>P</b> -<br><b>T</b> -                                   | -<br>-                                   | re: N-H = 0.86(2) Å<br>free              | free<br>free         | free<br>free                                                            |

<sup>a</sup>Location of water proton positions derived from electronic structure calculations (DFT-TS, see section 11).

## 4.3. XPac Comparison of Experimental Crystal Structures

### 4.3.1. General

Crystal packing comparisons were carried out using the program *XPac*<sup>1</sup> and quantitative dissimilarity parameters were generated in the previously described manner.<sup>2</sup> The pairwise comparisons of crystal structures were based on geometrical parameters generated from the positions of 20 atoms of the morphinane moiety (all non-H atoms except for C17 and those of R, see Figure 1). Water molecules and chloride anions have not been considered in this analysis.

An overview of packing relationships is given in Figure S3 and parameters associate with common supramolecular constructs<sup>1</sup> (SCs) identified in this study are collected in Tables S16-S20.

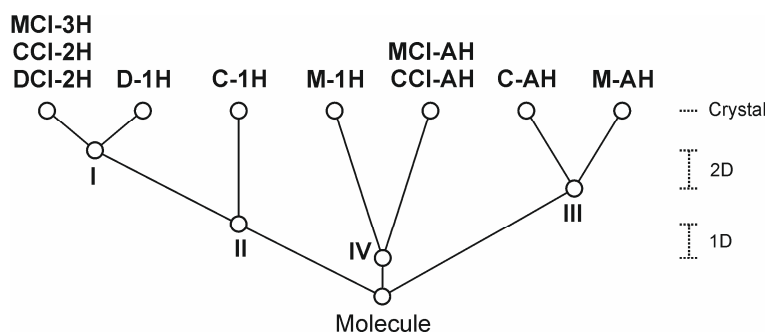

**Figure S3.** Overview of packing relationships between substructures composed of morphinane moieties of solid forms of morphine (M), codeine (C) and dionine (D), based on an *XPac* study.

#### 4.3.2. Subset: DCl-2H, CCl-2H MCl-3H, D-1H and C-1H

**Table S16.** Parameters associated 2D SCs **I** and **II** and with the isostructurality of the hydrochloride hydrates **DCl-2H**, **CCl-2H** and **MCl-3H**: lattice directions t1, t2 and t3 and corresponding *d* values (Å);  $\angle(t1, t2) = \angle(t1, t2) = \angle(t2, t3) = 90^\circ$ .

| Structure     | t1                   | t2                    | t3           | SCs          |
|---------------|----------------------|-----------------------|--------------|--------------|
| <b>DCl-2H</b> | 100 / 6.872          | 010 / 13.392          | 001 / 20.418 | <b>I, II</b> |
| <b>CCl-2H</b> | 100 / 6.762          | 010 / 12.932          | 001 / 20.308 | <b>I, II</b> |
| <b>MCl-3H</b> | 00 $\bar{1}$ / 6.941 | $\bar{1}00$ / 13.019  | 010 / 20.750 | <b>I, II</b> |
| <b>D-1H</b>   | $\bar{1}00$ / 7.082  | 0 $\bar{1}0$ / 13.149 | –            | <b>I, II</b> |
| <b>C-1H</b>   | –                    | 001 / 12.064          | –            | <b>II</b>    |

**Table S17.** *XPac* dissimilarity parameters for the 2D SC **I** and **II** and for the series of isostructures **DCl-2H**, **CCl-2H** and **MCl-3H** (*n* = number of surrounding molecules in a cluster which defining an SC).

| Structure 1   | Structure 2   | $x_1$ (SC <b>II</b> ; <i>n</i> = 4) | $x_2$ (SC <b>I</b> <i>n</i> = 8) | $x_3$ (complete) |
|---------------|---------------|-------------------------------------|----------------------------------|------------------|
| <b>DCl-2H</b> | <b>CCl-2H</b> | 6.0                                 | 5.2                              | 5.4              |
| <b>DCl-2H</b> | <b>MCl-3H</b> | 10.6                                | 9.6                              | 9.9              |
| <b>DCl-2H</b> | <b>D-1H</b>   | 3.7                                 | 4.1                              | –                |
| <b>DCl-2H</b> | <b>C-1H</b>   | 9.8                                 | –                                | –                |
| <b>CCl-2H</b> | <b>MCl-3H</b> | 4.8                                 | 4.3                              | 4.8              |
| <b>CCl-2H</b> | <b>D-1H</b>   | 5.9                                 | 5.7                              | –                |
| <b>CCl-2H</b> | <b>C-1H</b>   | 7.9                                 | –                                | –                |
| <b>MCl-3H</b> | <b>D-1H</b>   | 9.8                                 | 9.1                              | –                |
| <b>MCl-3H</b> | <b>C-1H</b>   | 9.3                                 | –                                | –                |
| <b>D-1H</b>   | <b>C-1H</b>   | 7.0                                 | –                                | –                |

#### 4.3.3. Subset: MCl-I°, CCl-I° and M-1H

**Table S18.** Parameters associated 1D SC **VI** and with the isostructurality of **M-1H** and **MCl-I°**: lattice directions t4, t5 and t6 and corresponding *d* values (Å);  $\angle(t4, t5) = \angle(t4, t6) = \angle(t5, t6) = 90^\circ$ .

| Structure     | t4                   | t5                   | t6           | SC        |
|---------------|----------------------|----------------------|--------------|-----------|
| <b>MCl-I°</b> | 00 $\bar{1}$ / 7.350 | $\bar{1}00$ / 12.852 | 010 / 16.037 | <b>IV</b> |
| <b>CCl-I°</b> | 100 / 7.144          | 010 / 13.230         | 001 / 16.541 | <b>IV</b> |
| <b>M-1H</b>   | 100 / 7.431          | –                    | –            | <b>IV</b> |

**Table S19.** *XPac* dissimilarity parameters for the 1D SC **IV** and for isostructures **DCl-2H**, **CCl-2H** and **MCl-3H** (*n* = number of surrounding molecules in a cluster which defining an SC).

| Structure 1   | Structure 2   | $x_1$ ( <i>n</i> = 2) | $x_2$ (complete) |
|---------------|---------------|-----------------------|------------------|
| <b>MCl-I°</b> | <b>M-1H</b>   | 8.1 <sup>a</sup>      | –                |
| <b>CCl-I°</b> | <b>M-1H</b>   | 10.7                  | –                |
| <b>MCl-I°</b> | <b>CCl-I°</b> | 5.9                   | 8.0 <sup>a</sup> |

<sup>a</sup> For a detailed discussion of this relationship, see ref. 3.

#### 4.3.4. Subset: C and M-I°

**Table S20.** Corresponding lattice direction t7 and t8 and corresponding  $d$  values (Å) associated with the 2D SC **III** (t7 and t8 form an angle of 90°). Parameters associated 2D SC **III**: lattice directions t7 and t8 and the corresponding  $d$  values (Å);  $\angle(t7, t8) = 90^\circ$ . The dissimilarity index  $x$  for the two instances of SC **III** in **C** and **M-I°** and is 4.7 (for  $n = 8$ ).

| Structure   | t7          | t8           | SC         |
|-------------|-------------|--------------|------------|
| <b>C</b>    | 100 / 7.491 | 001 / 14.775 | <b>III</b> |
| <b>M-I°</b> | 100 / 7.699 | 001 / 13.740 | <b>III</b> |

#### 4.4. Geometry of Classical Hydrogen Bonds

**Table S21.** Hydrogen bonding data of the free base structures.

| Cpd. <sup>a</sup>  | C <sub>3</sub> -O <sub>1</sub> H   |                                 |                     | C <sub>6</sub> -O <sub>3</sub> H   |                                 |                     | H <sub>2</sub> O (Water)           |                                 |                     | NW <sup>d</sup> |
|--------------------|------------------------------------|---------------------------------|---------------------|------------------------------------|---------------------------------|---------------------|------------------------------------|---------------------------------|---------------------|-----------------|
|                    | H-bond                             | GS <sup>c</sup>                 | <i>d</i> (O···X)/ Å | H-bond                             | GS <sup>c</sup>                 | <i>d</i> (O···X)/ Å | H-bond                             | GS <sup>c</sup>                 | <i>d</i> (O···O)/ Å |                 |
| M-AH               | O <sub>2</sub> -H···O <sub>3</sub> | C <sub>1</sub> <sup>1</sup> (8) | 2.757               | O <sub>3</sub> -H···O <sub>1</sub> | S <sub>1</sub> <sup>1</sup> (5) | 2.629               | –                                  | –                               | –                   | 1D              |
| M-MH               | O <sub>2</sub> -H···N              | C <sub>1</sub> <sup>1</sup> (9) | 2.635               | O <sub>3</sub> -H···O <sub>w</sub> | D <sub>1</sub> <sup>1</sup> (2) | 2.702               | O <sub>w</sub> -H···O <sub>2</sub> | D <sub>1</sub> <sup>1</sup> (2) | 2.966               | 3D              |
|                    |                                    |                                 |                     |                                    |                                 |                     | O <sub>w</sub> -H···O <sub>3</sub> | D <sub>1</sub> <sup>1</sup> (2) | 2.795               |                 |
| C-AH               | –                                  | –                               | –                   | O <sub>3</sub> -H···O <sub>1</sub> | S <sub>1</sub> <sup>1</sup> (5) | 2.643               | –                                  | –                               | –                   |                 |
| C-MH               | –                                  | –                               | –                   | O <sub>3</sub> -H···N              | C <sub>1</sub> <sup>1</sup> (8) | 2.817               | O <sub>w</sub> -H···O <sub>2</sub> | D <sub>1</sub> <sup>1</sup> (2) | 3.118               | 1D              |
|                    |                                    |                                 |                     |                                    |                                 |                     | O <sub>w</sub> -H···O <sub>3</sub> | D <sub>1</sub> <sup>1</sup> (2) | 2.925               |                 |
| cD-AH <sup>b</sup> | –                                  | –                               | –                   | O <sub>3</sub> -H···N              | C <sub>1</sub> <sup>1</sup> (8) | 2.748               | –                                  | –                               | –                   | 1D              |
| D-MH               | –                                  | –                               | –                   | O <sub>3</sub> -H···N              | C <sub>1</sub> <sup>1</sup> (8) | 2.775               | O <sub>w</sub> -H···O <sub>2</sub> | D <sub>1</sub> <sup>1</sup> (2) | 2.985               | 1D              |
|                    |                                    |                                 |                     |                                    |                                 |                     | O <sub>w</sub> -H···O <sub>3</sub> | D <sub>1</sub> <sup>1</sup> (2) | 2.886               |                 |

<sup>a</sup>Compound, <sup>b</sup>computationally generated structure, <sup>c</sup>graph-set motif, <sup>d</sup>dimensionality of hydrogen-bonding network.

**Table S22.** Hydrogen bonding data of the HCl salts.

| Cpd. <sup>a</sup>            | C <sub>3</sub> -O <sub>1</sub> H    |                                        |                    | C <sub>6</sub> -O <sub>3</sub> H    |                                        |                    | N <sup>+</sup> H     |                                        |                    | H <sub>2</sub> O (Water)             |                                        |                     | NW <sup>e</sup> |
|------------------------------|-------------------------------------|----------------------------------------|--------------------|-------------------------------------|----------------------------------------|--------------------|----------------------|----------------------------------------|--------------------|--------------------------------------|----------------------------------------|---------------------|-----------------|
|                              | H-bond                              | GS <sup>c</sup>                        | <i>d</i> (O···X)/Å | H-bond                              | GS <sup>c</sup>                        | <i>d</i> (O···X)/Å | H-bond               | GS <sup>c</sup>                        | <i>d</i> (N···X)/Å | H-bond <sup>d</sup>                  | GS <sup>c</sup>                        | <i>d</i> (O···X)/ Å |                 |
| MCl-AH                       | O <sub>2</sub> -H···Cl              | <i>D</i> <sub>1</sub> <sup>1</sup> (2) | 3.158              | O <sub>3</sub> -H···Cl              | <i>D</i> <sub>1</sub> <sup>1</sup> (2) | 3.142              | N-H···Cl             | <i>D</i> <sub>1</sub> <sup>1</sup> (2) | 3.062              | –                                    | –                                      | –                   | 1D              |
| MCl-TH                       | O <sub>2</sub> -H···O <sub>wc</sub> | <i>D</i> <sub>1</sub> <sup>1</sup> (2) | 2.821              | O <sub>3</sub> -H···O <sub>1</sub>  | <i>S</i> <sub>1</sub> <sup>1</sup> (5) | 2.717              | N-H···O <sub>3</sub> | <i>C</i> <sub>1</sub> <sup>1</sup> (8) | 2.799              | O <sub>WA</sub> -H···O <sub>2</sub>  | <i>D</i> <sub>1</sub> <sup>1</sup> (2) | 2.557               | 3D              |
|                              | –                                   | –                                      | –                  | –                                   | –                                      | –                  | –                    | –                                      | –                  | O <sub>WA</sub> -H···Cl              | <i>D</i> <sub>1</sub> <sup>1</sup> (2) | 3.156               |                 |
|                              | –                                   | –                                      | –                  | –                                   | –                                      | –                  | –                    | –                                      | –                  | O <sub>WB</sub> -H···O <sub>WA</sub> | <i>D</i> <sub>1</sub> <sup>1</sup> (2) | 2.697               |                 |
|                              | –                                   | –                                      | –                  | –                                   | –                                      | –                  | –                    | –                                      | –                  | O <sub>WB</sub> -H···Cl              | <i>D</i> <sub>1</sub> <sup>1</sup> (2) | 3.118               |                 |
|                              | –                                   | –                                      | –                  | –                                   | –                                      | –                  | –                    | –                                      | –                  | O <sub>wc</sub> -H···O <sub>3</sub>  | <i>D</i> <sub>1</sub> <sup>1</sup> (2) | 2.813               |                 |
|                              | –                                   | –                                      | –                  | –                                   | –                                      | –                  | –                    | –                                      | –                  | O <sub>wc</sub> -H···Cl              | <i>D</i> <sub>1</sub> <sup>1</sup> (2) | 3.239               |                 |
| CCl-AH                       | –                                   | –                                      | –                  | O <sub>3</sub> -H···Cl              | <i>D</i> <sub>1</sub> <sup>1</sup> (2) | 3.141              | N-H···Cl             | <i>D</i> <sub>1</sub> <sup>1</sup> (2) | 3.032              | –                                    | –                                      | –                   | 1D              |
| CCl-DH                       | –                                   | –                                      | –                  | O <sub>3</sub> -H···O <sub>w1</sub> | <i>D</i> <sub>1</sub> <sup>1</sup> (2) | 2.750              | N-H···O <sub>3</sub> | <i>C</i> <sub>1</sub> <sup>1</sup> (8) | 2.747              | O <sub>WB</sub> -H···Cl              | <i>D</i> <sub>1</sub> <sup>1</sup> (2) | 3.223               | 3D              |
|                              | –                                   | –                                      | –                  | –                                   | –                                      | –                  | –                    | –                                      | –                  | O <sub>WB</sub> -H···Cl              | <i>D</i> <sub>1</sub> <sup>1</sup> (2) | 3.247               |                 |
|                              | –                                   | –                                      | –                  | –                                   | –                                      | –                  | –                    | –                                      | –                  | O <sub>wc</sub> -H···O <sub>2</sub>  | <i>D</i> <sub>1</sub> <sup>1</sup> (2) | 2.890               |                 |
|                              | –                                   | –                                      | –                  | –                                   | –                                      | –                  | –                    | –                                      | –                  | O <sub>wc</sub> -H···Cl              | <i>D</i> <sub>1</sub> <sup>1</sup> (2) | 3.125               |                 |
| <i>c</i> DCI-AH <sup>b</sup> | –                                   | –                                      | –                  | O <sub>3</sub> -H···Cl              | <i>D</i> <sub>1</sub> <sup>1</sup> (2) | 3.115              | N-H···Cl             | <i>D</i> <sub>1</sub> <sup>1</sup> (2) | 3.033              | –                                    | –                                      | –                   | 1D              |
| DCI-DH                       | –                                   | –                                      | –                  | O <sub>3</sub> -H···O <sub>w1</sub> | <i>D</i> <sub>1</sub> <sup>1</sup> (2) | 2.804              | N-H···O <sub>3</sub> | <i>C</i> <sub>1</sub> <sup>1</sup> (8) | 2.754              | O <sub>WB</sub> -H···Cl              | <i>D</i> <sub>1</sub> <sup>1</sup> (2) | 3.303               | 3D              |
|                              | –                                   | –                                      | –                  | –                                   | –                                      | –                  | –                    | –                                      | –                  | O <sub>WB</sub> -H···Cl              | <i>D</i> <sub>1</sub> <sup>1</sup> (2) | 3.399               |                 |
|                              | –                                   | –                                      | –                  | –                                   | –                                      | –                  | –                    | –                                      | –                  | O <sub>wc</sub> -H···O <sub>2</sub>  | <i>D</i> <sub>1</sub> <sup>1</sup> (2) | 2.942               |                 |
|                              | –                                   | –                                      | –                  | –                                   | –                                      | –                  | –                    | –                                      | –                  | O <sub>wc</sub> -H···Cl              | <i>D</i> <sub>1</sub> <sup>1</sup> (2) | 3.217               |                 |

<sup>a</sup>Compound, <sup>b</sup>computationally generated structure, <sup>c</sup>graph-set motif, <sup>d</sup>Water positions according to Figure 10, <sup>e</sup>dimensionality of hydrogen-bonding network.



## 4.5. Packing Diagrams

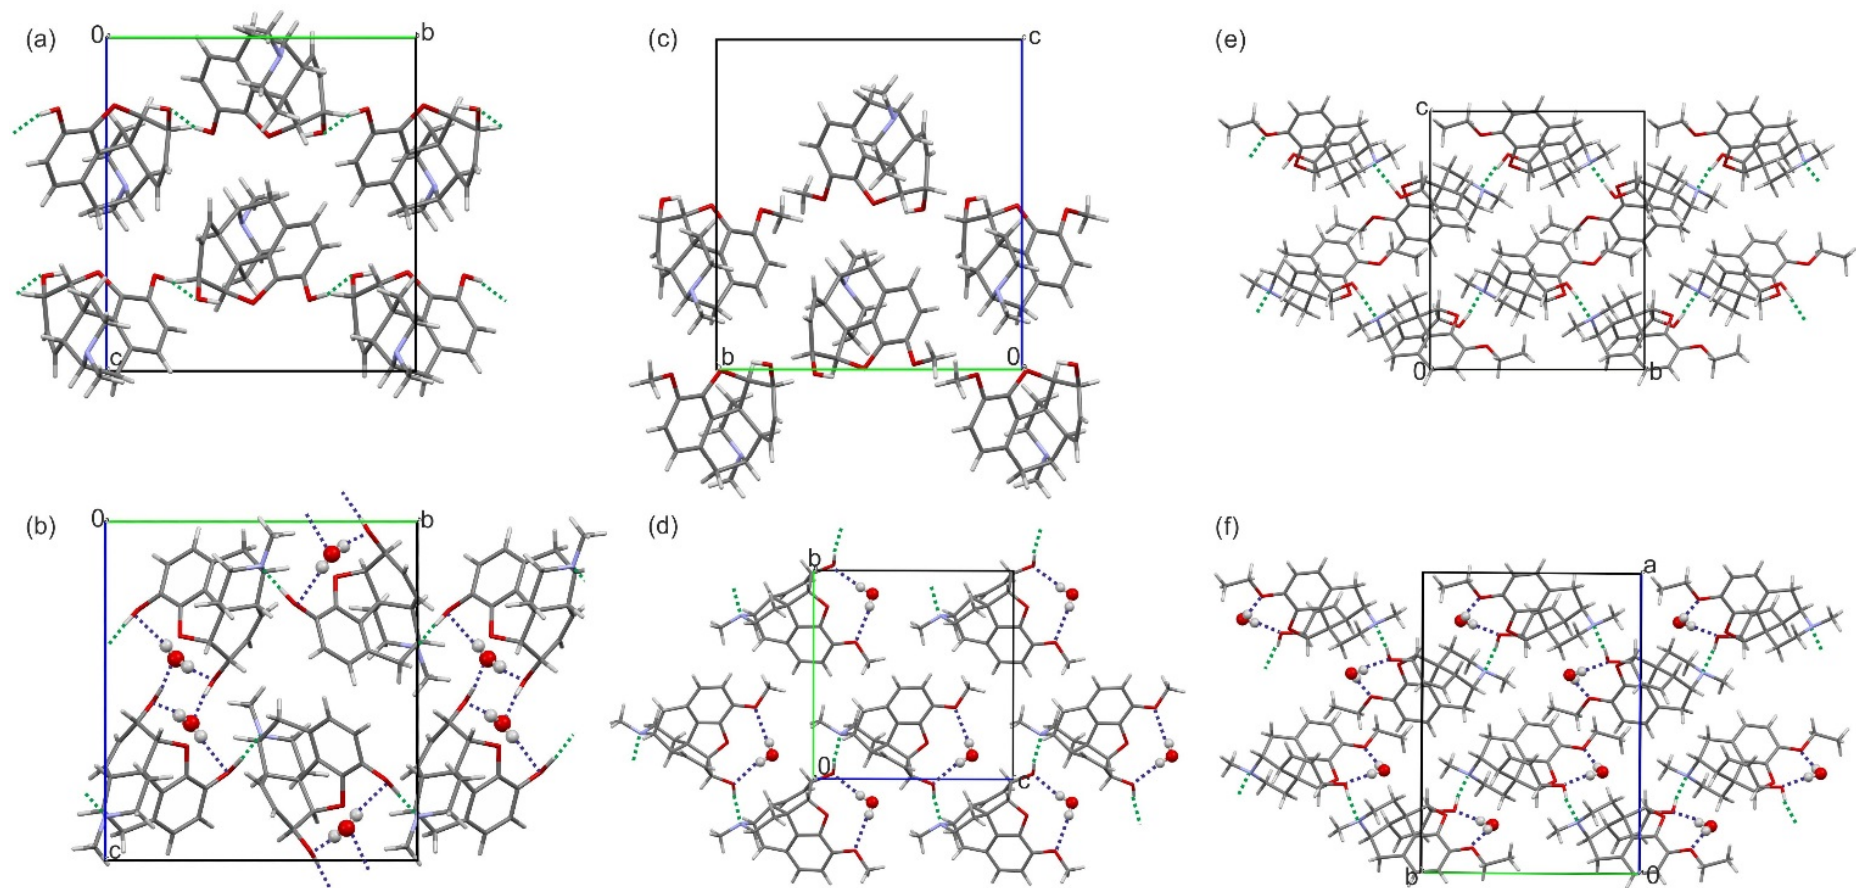

**Figure S4.** Packing diagrams of (a)  $M-I^{\circ}$ ,<sup>4</sup> (b)  $M-1H$ ,<sup>5</sup> (c)  $C-I^{\circ}$ ,<sup>6</sup> (d)  $C-1H$ , (e)  $D-AH$ , and (f)  $D-I_{calc}$ . Hydrogen bonds are depicted with dotted lines.

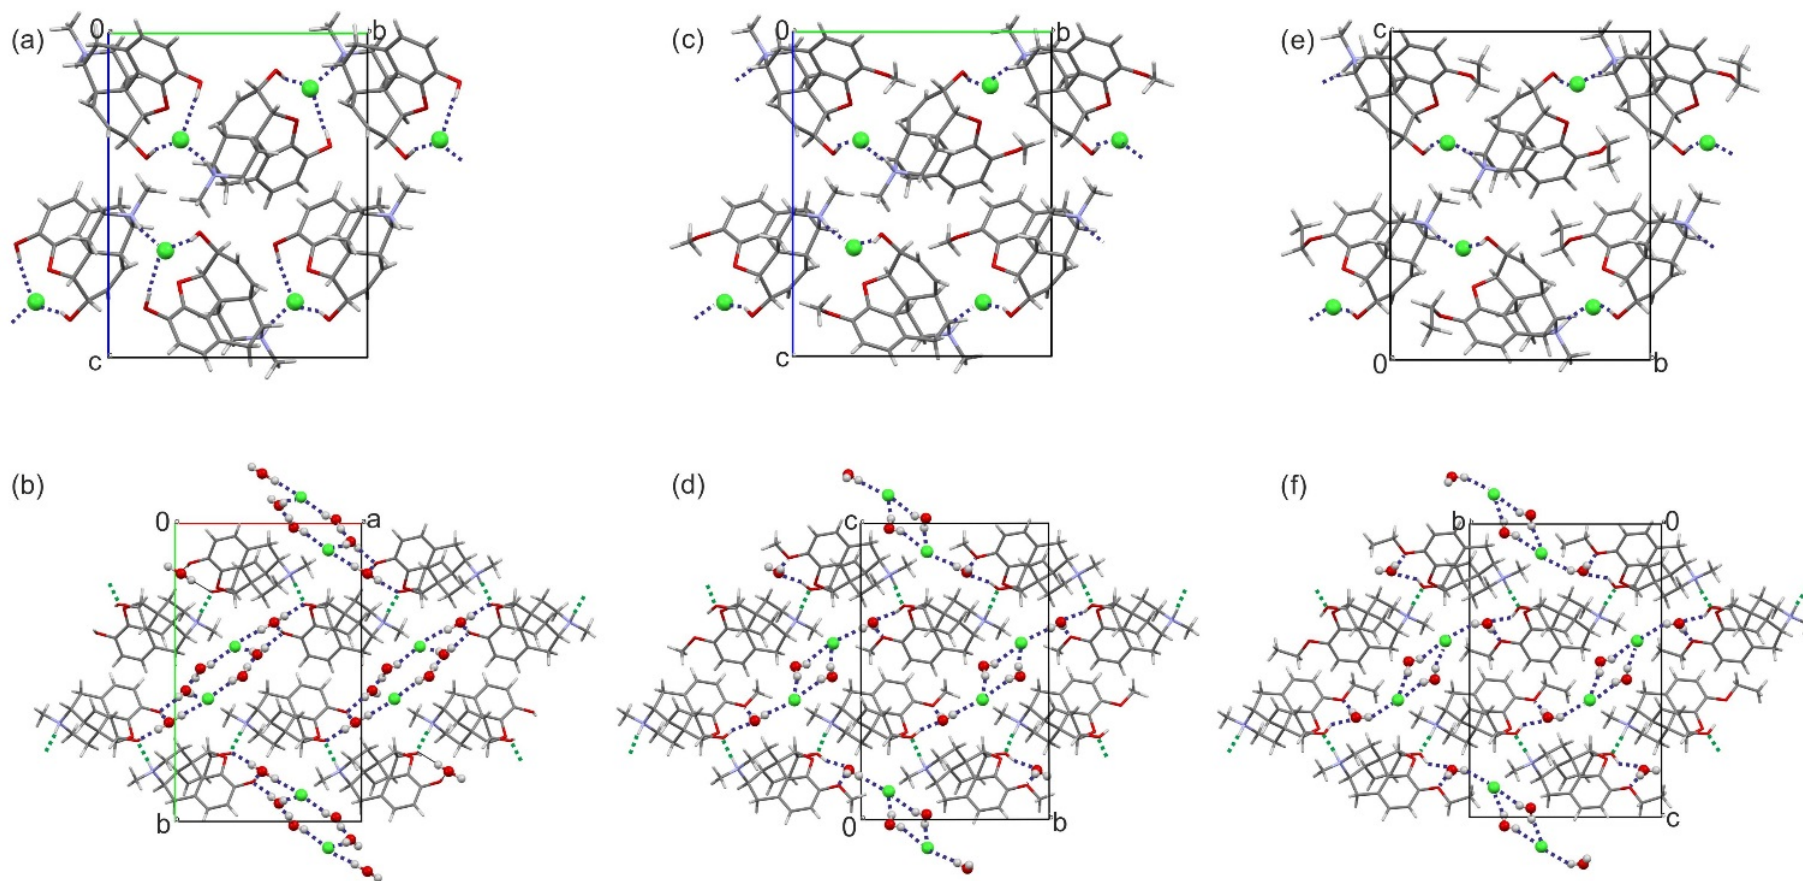

**Figure S5.** Packing diagrams of (a)  $\text{MCl-I}^\circ$ ,<sup>3</sup> (b)  $\text{MCl-3H}$ ,<sup>7</sup> (c)  $\text{CCl-I}^\circ$ , (d)  $\text{CCl-2H}$ , (e)  $\text{DCI-I}^\circ_{\text{calc}}$ , and (f)  $\text{DCI-2H}$ . Hydrogen bonds are depicted with dotted lines.

## 5. Powder X-ray Diffraction

PXRD patterns of different solid forms of the six investigated morphinanes are given in Figure S6.

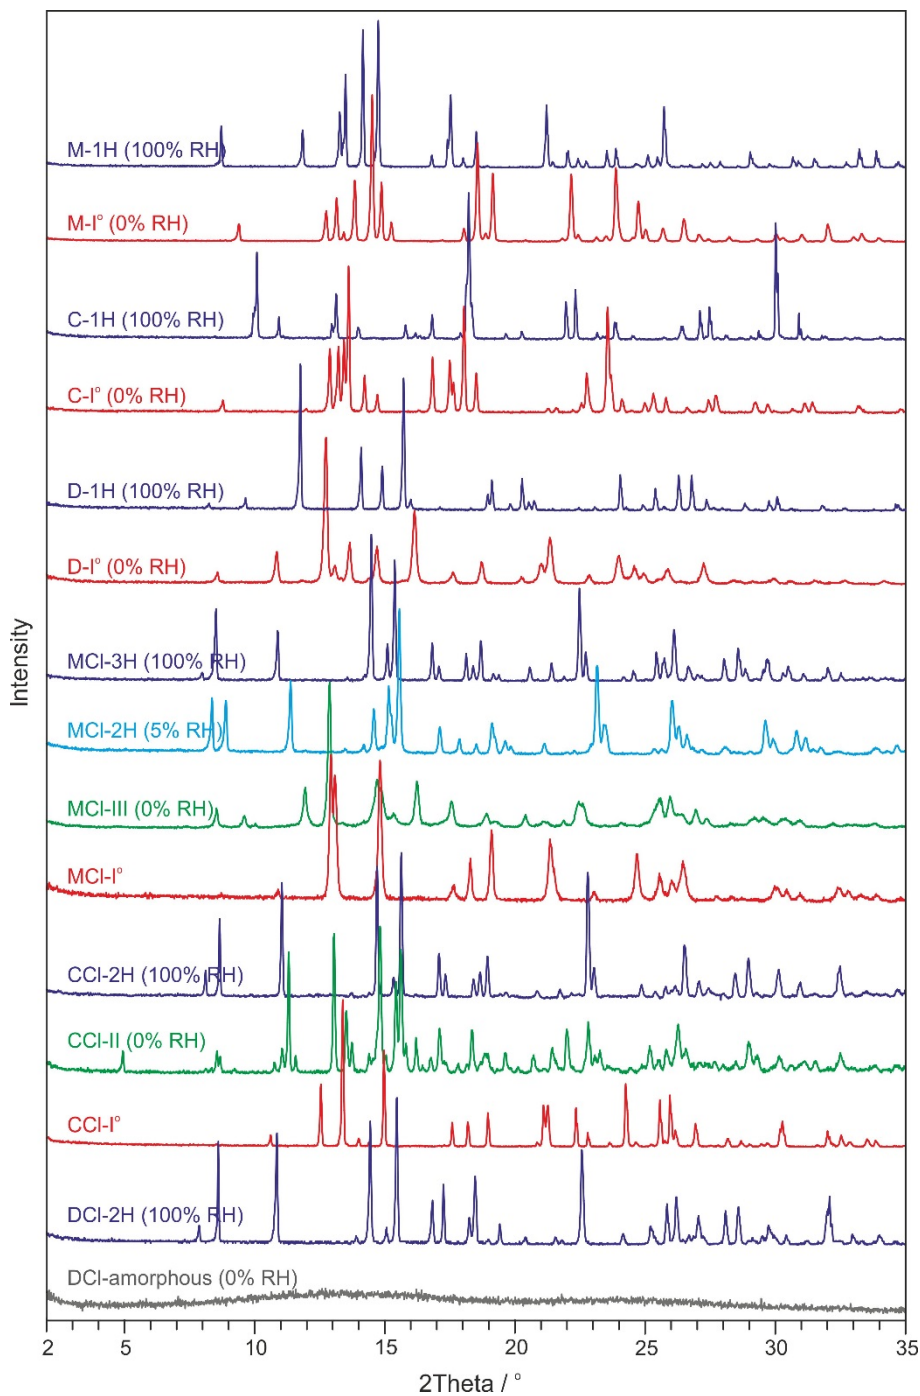

**Figure S6.** PXRD patterns of morphinane solid forms. Hydrate phases in blue and violet, stable anhydrate in red, unstable anhydrates in green and amorphous in grey.

Selected PXRD patterns used for constructing the Guinier plots (Figure 5) are given below (Figure S7).

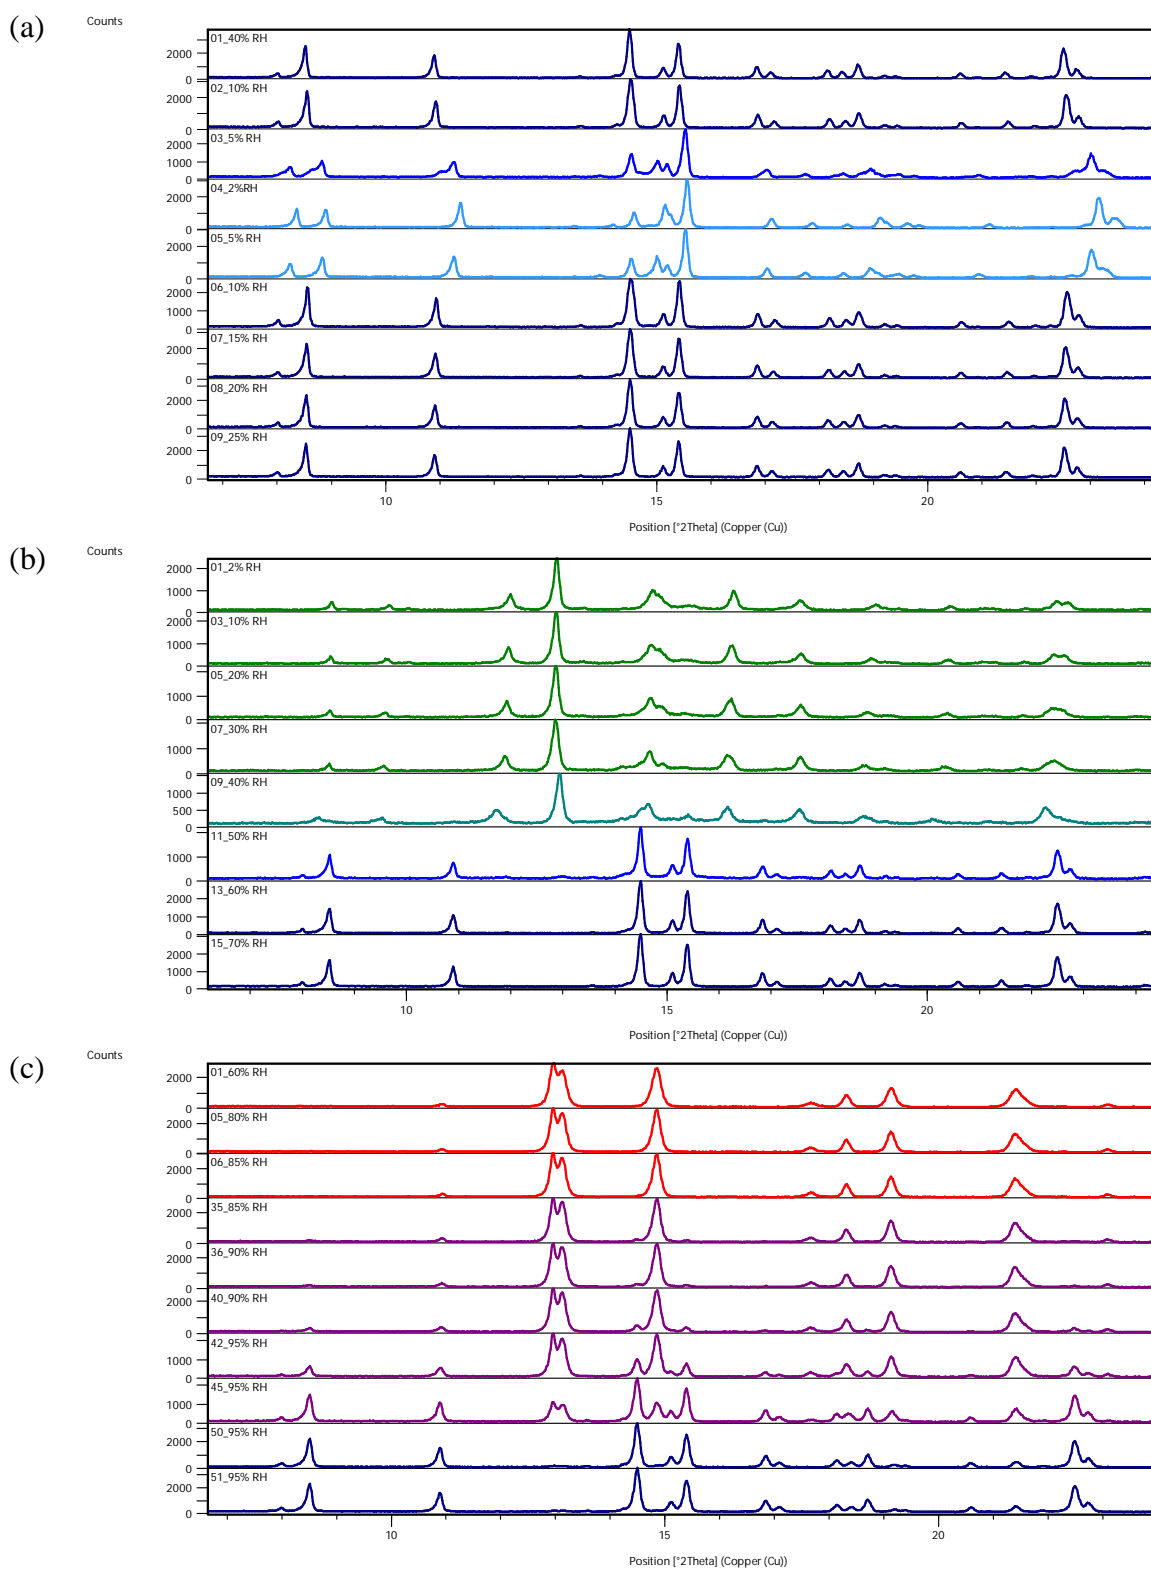

**Figure S7.** Moisture dependent PXRD measurements of MCl: starting with (a) MCl-3H, (b) MCl-III, and (c) MCl-I°. Numbers indicate the order and RH settings of the measurements.

## 6. Hot-stage Microscopy

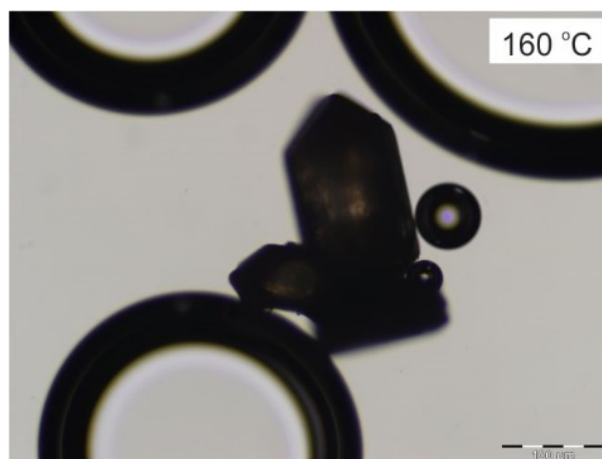

**Figure S8.** M-1H crystals embedded in silicon oil showing the formation of bubbles, i.e. M-1H to M-I° phase transformation.

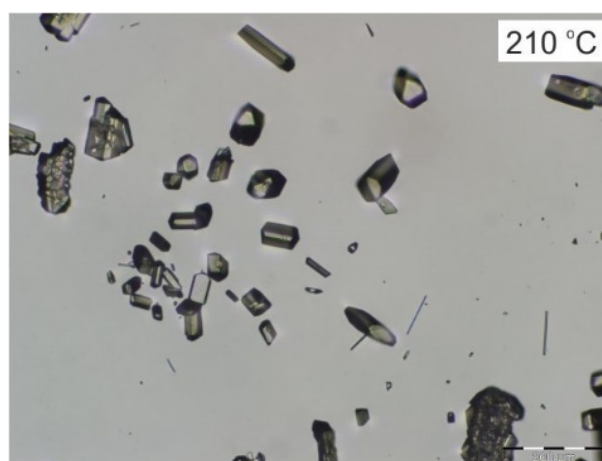

**Figure S9.** Morphine sublimates. Note that all of the crystals correspond to the same polymorphic form, M-I°.

## 7. Morphine (M): Differential Scanning Calorimetry + Powder X-ray Diffraction

M-1H was heated in 1-pinholes DSC pans at a heating rate of  $20\text{ }^{\circ}\text{C min}^{-1}$  (Figure S10). Measurements were stopped at predefined temperatures and the samples analysed with PXRD (Figure S11). The measurements confirmed the hydrate peritectic melting at  $201.3\pm 0.5\text{ }^{\circ}\text{C}$  (dehydration was not complete at  $180\text{ }^{\circ}\text{C}$ , a mixture of M-1H and M-I° was present), and that the peak splitting at  $260\text{ }^{\circ}\text{C}$  can be attributed to melting and decomposition rather than the presence of two polymorphs (only one phase present at  $230\text{ }^{\circ}\text{C}$ ).

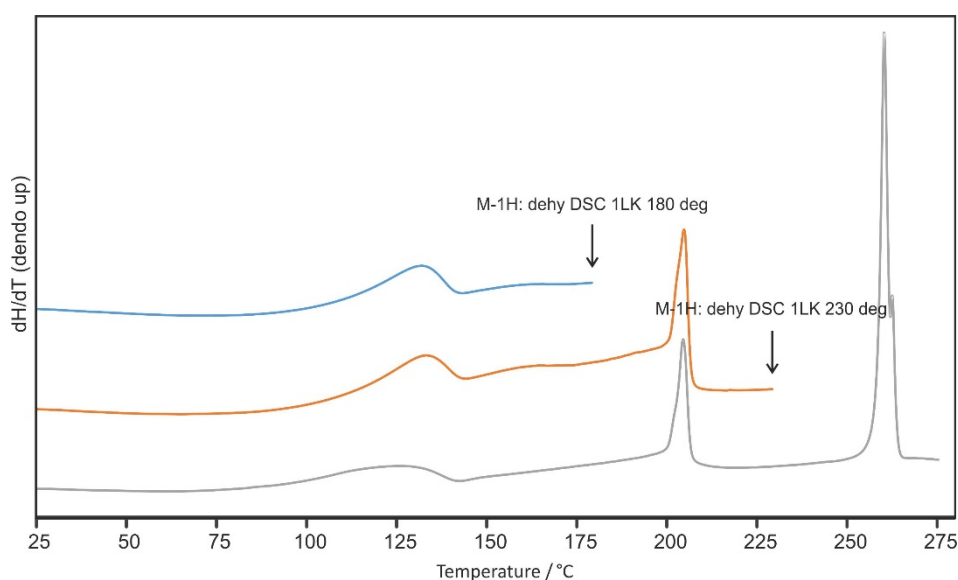

**Figure S10.** DSC thermograms of M-1H using a heating rate of  $20\text{ }^{\circ}\text{C min}^{-1}$ .

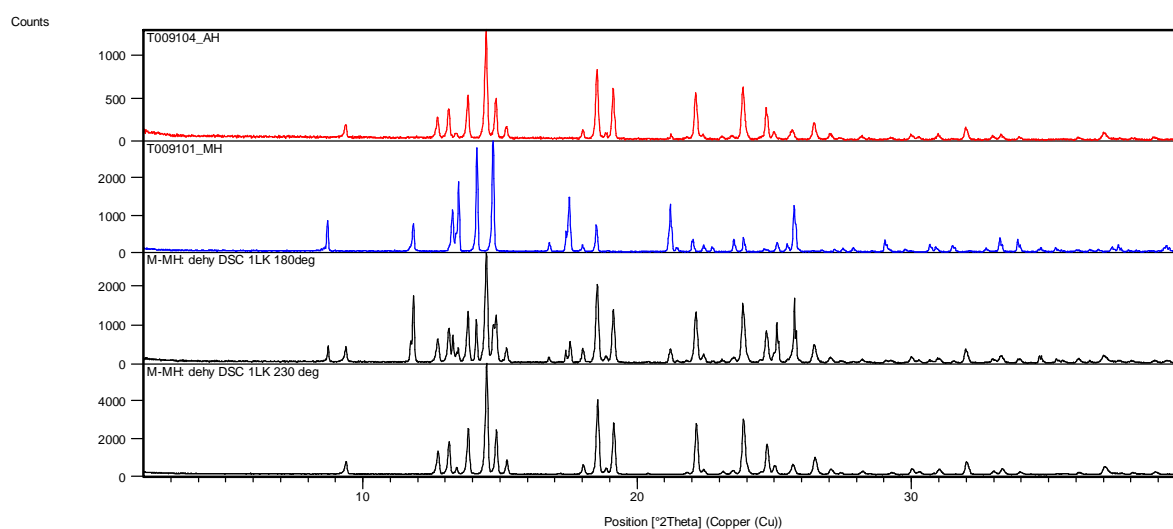

**Figure S11.** PXRD patterns of: M-I° (1<sup>st</sup>), M-1H (2<sup>nd</sup>), M-1H heated to  $180\text{ }^{\circ}\text{C}$  (3<sup>rd</sup>) and to  $230\text{ }^{\circ}\text{C}$  (4<sup>th</sup>).

## 8. Ethylmorphine (D): Infrared Spectroscopy

Infrared spectra of **D** (Figure S12) were recorded with a ZnSe ATR crystal (MIRacle, PIKE Technologies, Inc., USA) on a Perkin Elmer Spectrum GX (Perkin Elmer, Norwalk Ct., USA) over a range of 4000 to 600  $\text{cm}^{-1}$  with a resolution of 2  $\text{cm}^{-1}$  (64 scans).

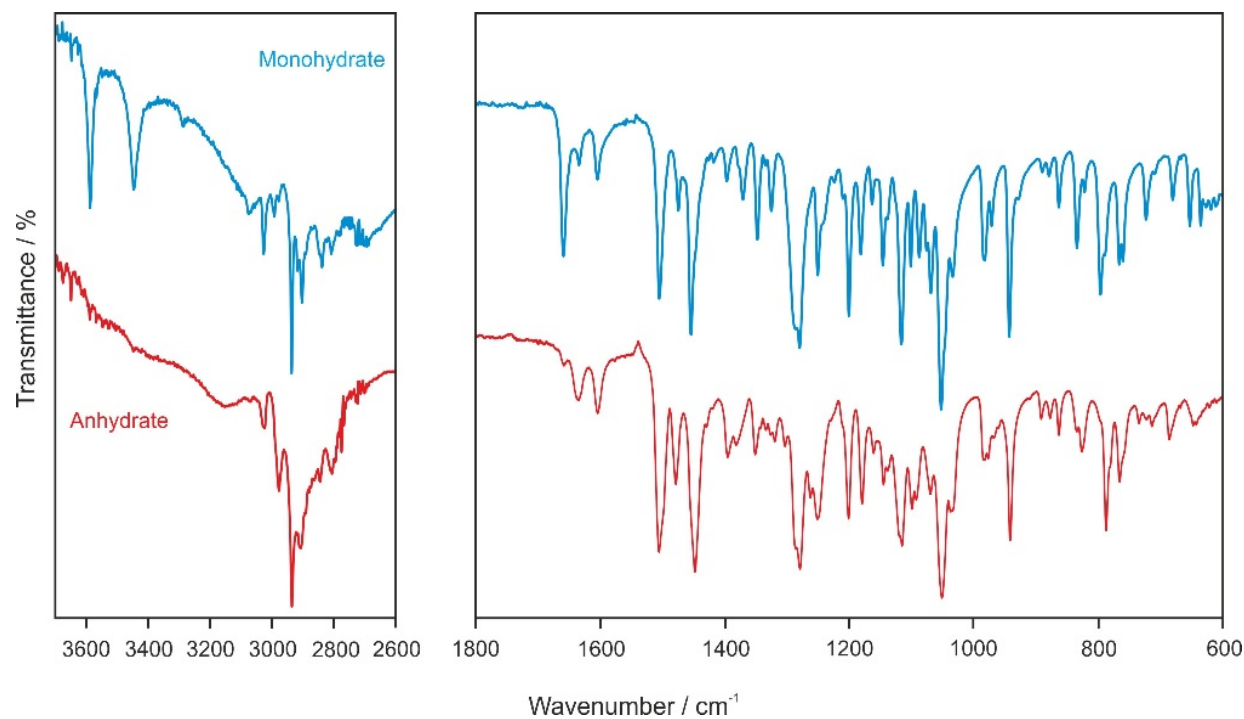

**Figure S12.** IR spectra of **D-1H** (blue) and **D-I<sup>o</sup>** (red).

## 9. Transformation Schemes

### 9.1. Morphine (M)

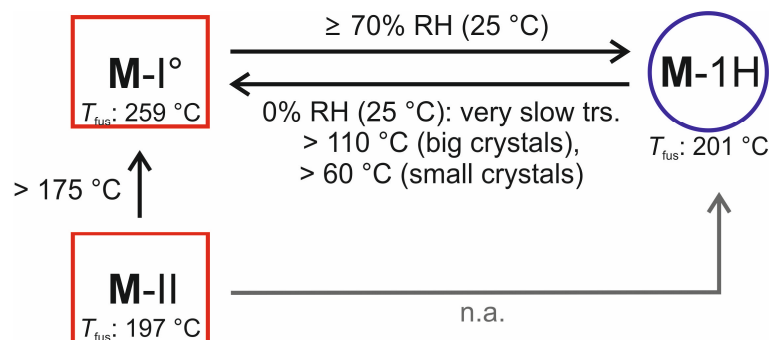

**Figure S13.** Transformation scheme of morphine solid forms.  $T_{fus}$  – melting point, n.a. – not attempted.

### 9.2. Codeine (C)

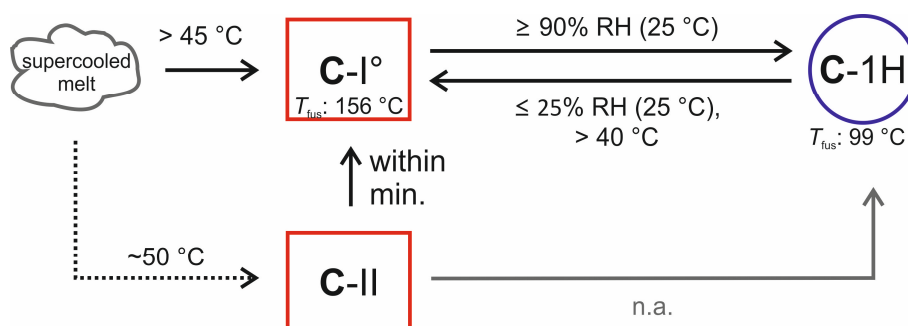

**Figure S14.** Transformation scheme of codeine solid forms.  $T_{fus}$  – melting point, n.a. – not attempted.

### 9.3. Ethylmorphine (D)

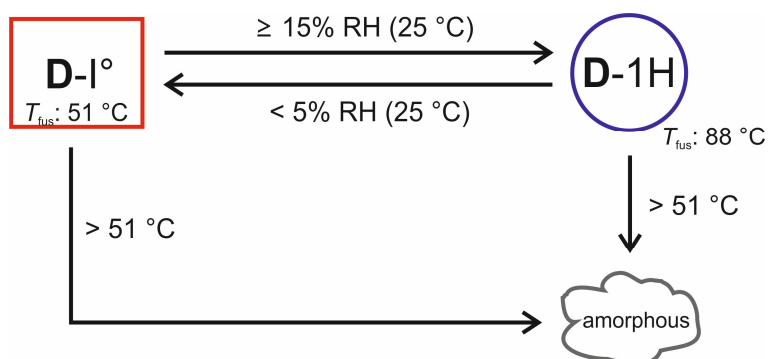

**Figure S15.** Transformation scheme of ethylmorphine solid forms.  $T_{fus}$  – melting point.



#### 9.4. Morphine HCl (MCI)

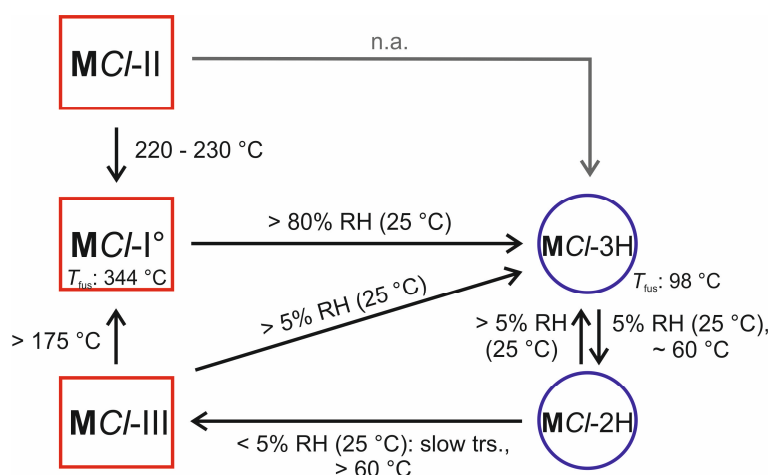

**Figure S16.** Transformation scheme of morphine HCl solid forms.  $T_{\text{fus}}$  – melting point, n.a. – not attempted.

#### 9.5. Codeine HCl (CCI)

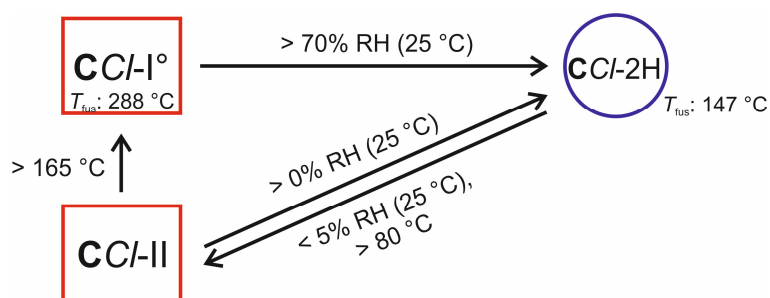

**Figure S17.** Transformation scheme of codeine HCl solid forms.  $T_{\text{fus}}$  – melting point.

#### 9.6. Ethylmorphine HCl (DCI)

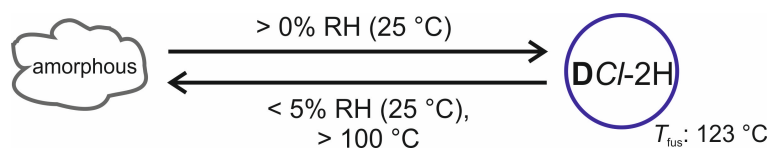

**Figure S18.** Transformation scheme of ethylmorphine HCl solid forms.  $T_{\text{fus}}$  – melting point.

## B) Computational

### 10. Conformational Analysis of Morphine (M), Codeine (C) and Ethylmorphine (D)

Conformational energy scans were performed at the SCF/6-31G(d,p) and PBE0/6-31G(d,p) levels of theory using GAUSSIAN09.<sup>8</sup> We considered the main torsion angles depicted in Figure S19 and performed an optimized 1D scan for  $\phi_3$  (**D**) and 2D scans for the combination of the dihedrals  $\phi_1$  and  $\phi_2$  (**M**, **C** and **D**).

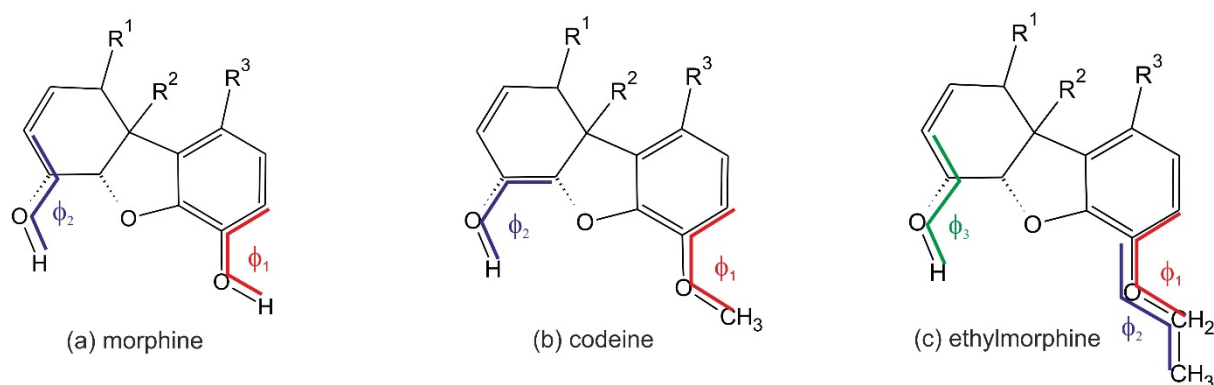

**Figure S19.** Molecular diagrams of the investigated morphinanes depicting the torsional degrees of freedom.

#### 10.1. Morphine (M)

The 2D scan for the combination of  $\phi_1$  and  $\phi_2$  for **M** resulted in three conformational minima (Figure S20). In the global conformational minimum the phenolic OH group adopts a position co-coplanar with the benzene ring with the OH proton pointing towards to the ether oxygen ( $\phi_1 = 180^\circ$ ) and the cyclic OH group forming an intramolecular hydrogen bond with the ether oxygen. The phenolic OH group can rotate significantly for minimal energy cost. A  $180^\circ$  flip of the phenolic OH group results in the second lowest energy conformation ( $\phi_1 = 0^\circ$ ; ca.  $9 \text{ kJ mol}^{-1}$  less stable than the global conformational energy minimum, calculated at the SCF/6-31 G(d,p) level of theory). The energy barrier between these two conformations was calculated to be less than  $14 \text{ kJ mol}^{-1}$ . A higher energy barrier was calculated for breaking the intramolecular hydrogen bond, i.e. approx.  $20 \text{ kJ mol}^{-1}$ . The lowest energy conformation exhibiting no intramolecular O3–H $\cdots$ O1 hydrogen bond (the 3<sup>rd</sup> minimum) was found to be approx.  $17 \text{ kJ mol}^{-1}$  less favorable than the global minimum conformation, with the phenolic OH group being

co-planar with the benzene ring and pointing towards to the ether oxygen (as observed in the global conformational energy minimum).

The experimentally observed conformations of the **MCl** structures can be related to the global energy minimum region (Figure S20), although differ from the global minimum conformation, due to the presence of the  $\text{Cl}^-$  ion in the structures. In **M-I**<sup>o</sup> the morphine molecule adopts a conformation similar to the second lowest energy conformation (intramolecular hydrogen-bonded conformation) and in **M-1H** a high energy conformation, due to the loss of the intramolecular hydrogen bond. The PCM (polarizable continuum model, using a dielectric constant of  $\epsilon=3$ ) slightly lowers the energy barriers (Figure S20b), but the shape of the potential energy surface landscape is preserved.

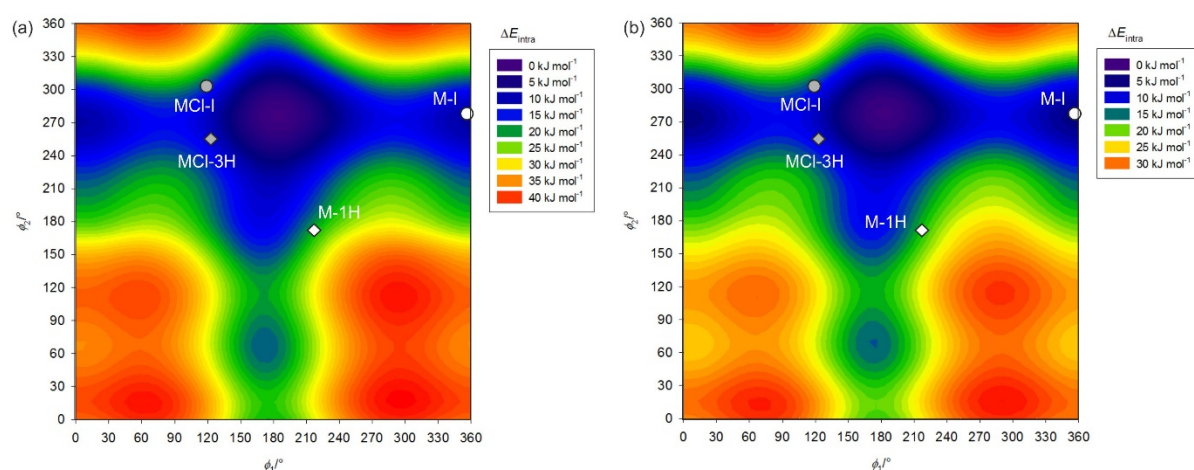

**Figure S20.** 2D potential energy surface scans for **M** with respect to  $\phi_1$  and  $\phi_2$  (Figure S19a) at (a) the SCF level of theory with the 6-31G(d,p) basis set and (b) PCM model ( $\epsilon=3$ ) using SCF/6-31G(d,p), with the rest of the molecule optimized at each value of  $\phi$ , which was calculated every  $20^\circ$ . Experimental conformations are indicated with diamonds and circles.

## 10.2. Codeine (C)

The 2D conformational energy scan of  $\phi_1$  and  $\phi_2$  for **C** resulted in three low energy conformations, all exhibiting the  $\text{O3-H}\cdots\text{O1}$  intramolecular hydrogen bond and differing each by  $120^\circ$  rotation of the  $\phi_1$  torsion (Figure S21). The energy barrier for a  $360^\circ$  rotation was calculated to be less than  $7 \text{ kJ mol}^{-1}$  (SCF/6-31 G(d,p) level of theory). The lowest energy conformation, exhibiting no  $\text{O3-H}\cdots\text{O1}$  intramolecular hydrogen bond was estimated to be approx.  $22 \text{ kJ mol}^{-1}$  (SCF/6-31 G(d,p) level of theory) higher in energy than the global

conformational minimum. The PCM (polarizable continuum model, using a dielectric constant of  $\epsilon=3$ ) slightly narrows the energy barriers (Figure S21b) in contrast to Figure S21a, but the shape of the potential energy surface landscape is preserved.

Three of the experimentally observed conformations (**C-1**<sup>o</sup>, **CCI-1**<sup>o</sup> and **CCI-2H**) can be related to the low energy conformations exhibiting an intramolecular O3–H...O1 hydrogen bond, although the **CCI-1**<sup>o</sup> conformation differs significantly from the closest related low energy conformations (Figure S21). The molecular conformation observed in **C-1H** is a high energy conformation, as O3–H forms an intermolecular hydrogen bond.

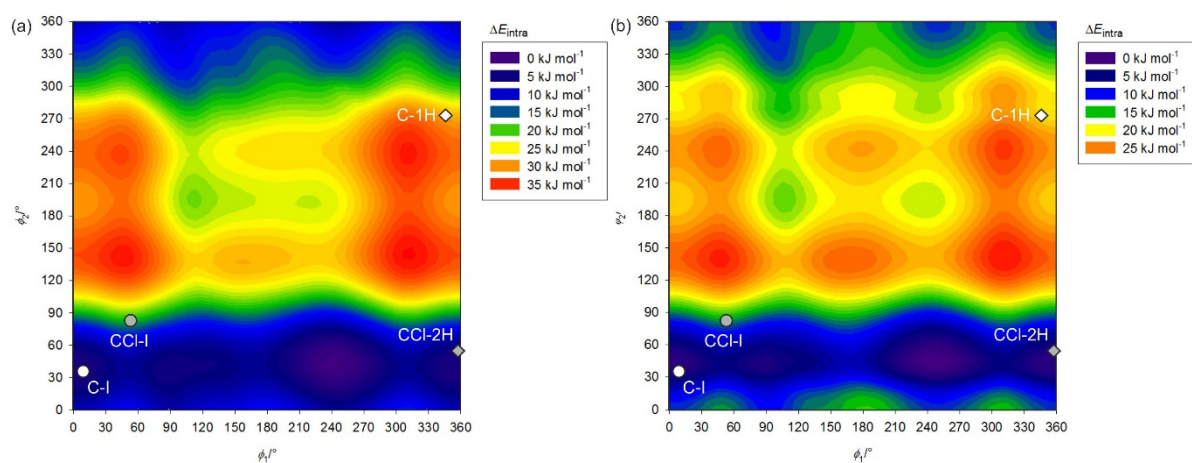

**Figure S21.** 2D potential energy surface scans for **C** with respect to  $\phi_1$  and  $\phi_2$  (Figure 19b) at (a) the SCF level of theory with the 6-31G(d,p) basis set and (b) PCM model ( $\epsilon=3$ ) using SCF/6-31G(d,p), with the rest of the molecule optimized at each value of  $\phi$ , which was calculated every 20°. Experimental conformations are indicated with diamonds and circles.

### 10.3. Ethylmorphine (**D**)

The 1D scan of the C7–C6–O3–H torsion ( $\phi_3$ , Figure 22) exhibits a broad minimum arising from the intramolecular hydrogen bond, i.e the –OH group can move significantly for minimal energy cost. A significant energy barrier is observed for breaking the intramolecular hydrogen bond. This energy barrier can be compensated by the formation of an additional intermolecular hydrogen bond, as in **D-1H** ( $\phi_3 = 128^\circ$ ). In **DCI-2H**  $\phi_3 = 297^\circ$ .

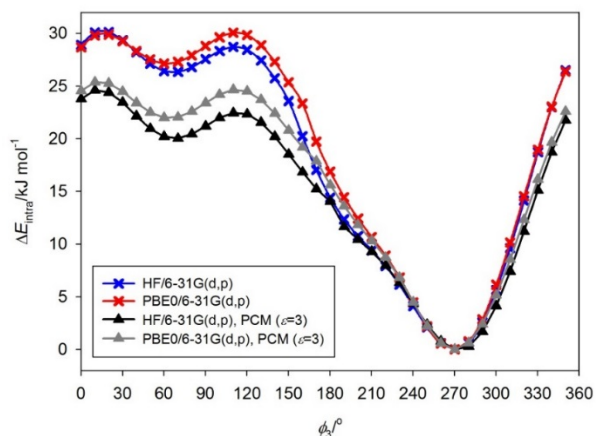

**Figure S22.** 1D potential energy surface scans for **D** with respect to  $\phi_3$  (Figure S19c) at the SCF/6-31G (d,p) and PBE0/6-31G(d,p) levels of theory.

The ethoxy-group of the **D** molecule ( $\phi_1$ , Figure S19c) can rotate significantly with minimal energy cost. The energy barrier for a 360° rotation was calculated to be less than 8 kJ mol<sup>-1</sup> (Figure S23, SCF/6-31 G(d,p) level of theory). The energetically most favourable orientation for  $\phi_1$  (Figure 19c) = 180° and is observed in all experimental structures. Also  $\phi_2$  can rotate significantly for minimal energy cost.

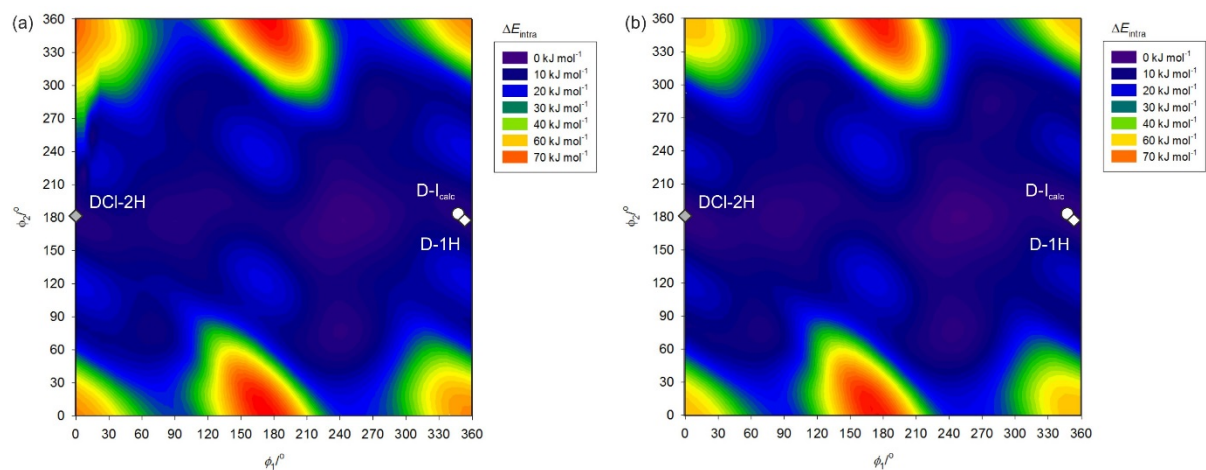

**Figure S23.** 2D potential energy surface scans for **D** with respect to  $\phi_1$  and  $\phi_2$  (Figure S19c) at (a) the SCF level of theory with the 6-31G(d,p) basis set and (b) PCM model ( $\epsilon=3$ ) using SCF/6-31G(d,p), with the rest of the molecule optimized at each value of  $\phi$ , which was calculated every 20°. Experimental conformations are indicated with diamonds and circles.

## 11. Periodic Electronic Structure Calculations (DFT-D): Modelling Details

Brillouin zone integrations were performed on a symmetrized Monkhorst–Pack  $k$ -point grid with the number of  $k$ -points chosen to provide a maximum spacing of  $0.07 \text{ \AA}^{-1}$ . The basis set cut-off (780 eV) and  $k$ -point spacing were chosen after convergence studies of the total energy of the  $\text{M-I}^\circ$  and  $\text{MCl-3H}$  crystal structures. The self-consistent field convergence on total energy was set to  $1 \times 10^{-5}$  eV for all minimizations and single-point calculations. Energy minimizations were performed using the Broyden–Fletcher–Goldfarb–Shanno optimization scheme within the space group constraints of the experimentally determined crystal structures. Minimizations were considered complete when energies were converged to better than  $2 \times 10^{-5}$  eV per atom, atomic displacements converged to  $1 \times 10^{-3} \text{ \AA}$ , maximum forces to  $5 \times 10^{-2} \text{ eV \AA}^{-1}$ , and, when the unit cell was relaxed, maximum stresses were converged to  $1 \times 10^{-1}$  GPa. Energy minimizations with variable unit cells were restarted after the first minimization to reduce the effects of changes in unit cell on the basis set. Isolated molecule minimizations to compute the isolated molecule energy ( $E_{\text{gas}}$ ) were performed by placing a single molecule in a fixed cubic  $35 \times 35 \times 35 \text{ \AA}^3$  unit cell with the same settings as used for the crystal optimization calculations.

## 12. Representation of the Experimental Structures

The computational model (DFT-TS) was successful in reproducing the experimental structures of the six investigated morphinanes (Table S23).

**Table S23.** Quality of representation of the experimental structures (all  $P2_12_12_1$ ). Standard settings are used for all structures.

| Solid Form, Temp                                | Lattice parameters (cell vectors/Å) |          |          | cell density (g cm <sup>-3</sup> ) | rmsd <sub>15</sub> <sup>a</sup> (Å) |
|-------------------------------------------------|-------------------------------------|----------|----------|------------------------------------|-------------------------------------|
|                                                 | <i>a</i>                            | <i>b</i> | <i>c</i> |                                    |                                     |
| <b>M-I</b> <sup>o</sup> , 173 K                 | 7.699                               | 12.737   | 13.740   | 1.407                              |                                     |
| <b>M-I</b> <sup>o</sup> <sub>calc</sub> , 0 K   | 7.671                               | 12.612   | 13.655   | 1.435                              | 0.06                                |
| <b>M-1H</b> , 25 K                              | 7.431                               | 13.769   | 14.944   | 1.318                              |                                     |
| <b>M-1H</b> <sub>calc</sub> , 0 K               | 7.306                               | 13.659   | 14.653   | 1.378                              | 0.12                                |
| <b>C-I</b> <sup>o</sup> , 20 K                  | 7.335                               | 13.647   | 14.735   | 1.348                              |                                     |
| <b>C-I</b> <sup>o</sup> <sub>calc</sub> , 0 K   | 7.282                               | 13.528   | 14.594   | 1.383                              | 0.08                                |
| <b>C-1H</b> , 173 K                             | 10.399                              | 12.567   | 12.064   | 1.337                              |                                     |
| <b>C-1H</b> <sub>calc</sub> , 0 K               | 10.294                              | 12.050   | 12.452   | 1.365                              | 0.06                                |
| <b>D-1H</b> , 173 K                             | 7.082                               | 13.149   | 18.058   | 1.309                              |                                     |
| <b>D-1H</b> <sub>calc</sub> , 0 K               | 6.981                               | 13.144   | 17.733   | 1.353                              | 0.09                                |
| <b>MCl-I</b> <sup>o</sup> , 173 K               | 7.350                               | 12.852   | 16.037   | 1.411                              |                                     |
| <b>MCl-I</b> <sup>o</sup> <sub>calc</sub> , 0 K | 7.274                               | 12.799   | 16.010   | 1.434                              | 0.05                                |
| <b>MCl-3H</b> , RT                              | 6.941                               | 13.019   | 20.750   | 1.331                              |                                     |
| <b>MCl-3H</b> <sub>calc</sub> , 0 K             | 6.721                               | 13.168   | 20.566   | 1.372                              | 0.35                                |
| <b>CCl-I</b> <sup>o</sup> , 173 K               | 7.144                               | 13.230   | 16.541   | 1.427                              |                                     |
| <b>CCl-I</b> <sup>o</sup> <sub>calc</sub> , 0 K | 7.105                               | 13.226   | 16.412   | 1.446                              | 0.05                                |
| <b>CCl-2H</b> , 123 K                           | 6.762                               | 12.932   | 20.308   | 1.391                              |                                     |
| <b>CCl-2H</b> <sub>calc</sub> , 0 K             | 6.677                               | 12.895   | 20.261   | 1.416                              | 0.08                                |
| <b>DCI-2H</b> , 173 K                           | 6.872                               | 13.392   | 20.418   | 1.364                              |                                     |
| <b>DCI-2H</b> <sub>calc</sub> , 0 K             | 6.775                               | 13.302   | 20.247   | 1.405                              | 0.08                                |

<sup>a</sup>Reproduction of the crystal structures was evaluated by the optimal root-mean square overlay of all non-hydrogen atoms in a 15 molecule coordination cluster (rmsd<sub>15</sub>).

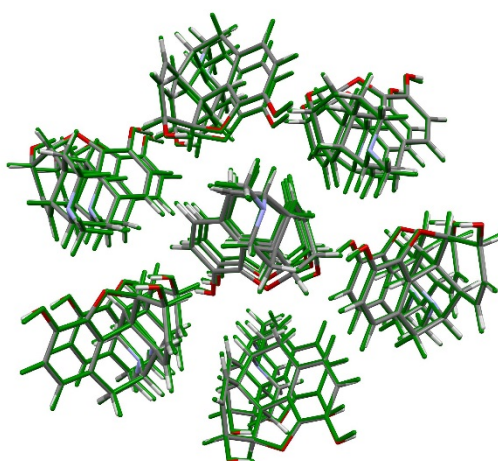

**Figure S24.** Overlay of the 15 molecule cluster of the observed structure of **M-I**<sup>o</sup> (colored by element) and calculated DFT-TS structure (green), rmsd<sub>15</sub>=0.06 Å.

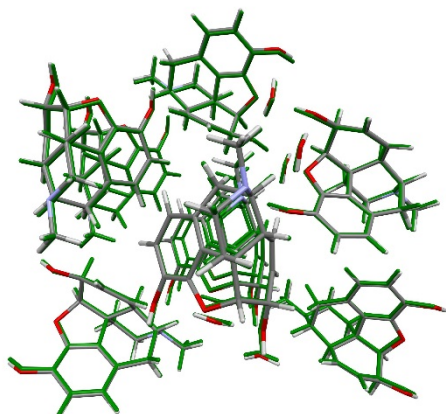

**Figure S25.** Overlay of the 15 molecule cluster of the observed structure of **M-1H** (colored by element) and calculated DFT-TS structure (green),  $\text{rmsd}_{15}=0.12 \text{ \AA}$ .

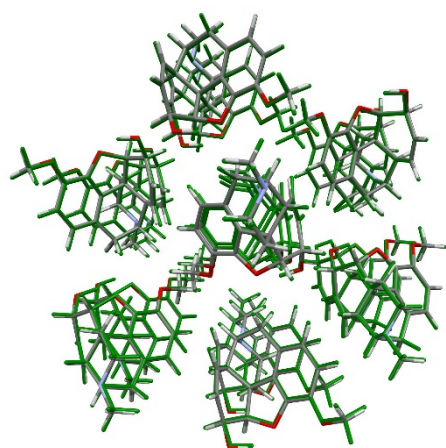

**Figure S26.** Overlay of the 15 molecule cluster of the observed structure of **C-I°** (colored by element) and calculated DFT-TS structure (green),  $\text{rmsd}_{15}=0.08 \text{ \AA}$ .

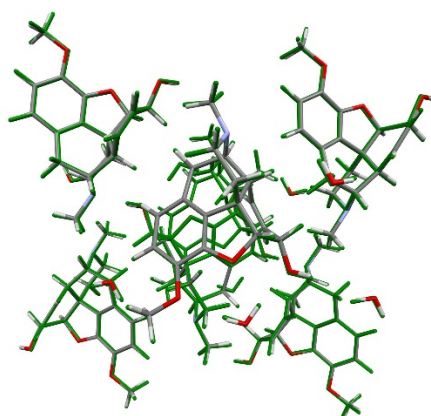

**Figure S27.** Overlay of the 15 molecule cluster of the observed structure of **C-1H** (colored by element) and calculated DFT-TS structure (green),  $\text{rmsd}_{15}=0.06 \text{ \AA}$ .



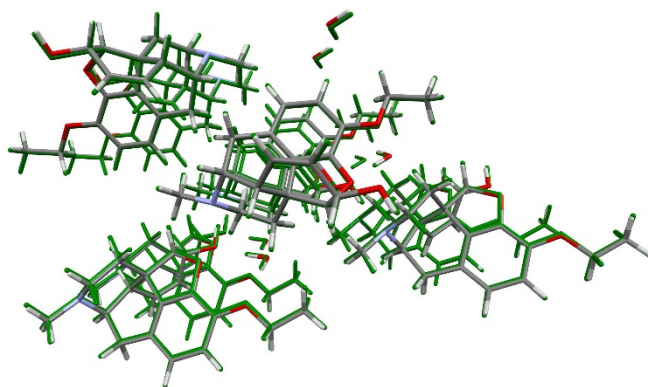

**Figure S28.** Overlay of the 15 molecule cluster of the observed structure of **D-1H** (colored by element) and calculated DFT-TS structure (green),  $\text{rmsd}_{15}=0.09 \text{ \AA}$ .

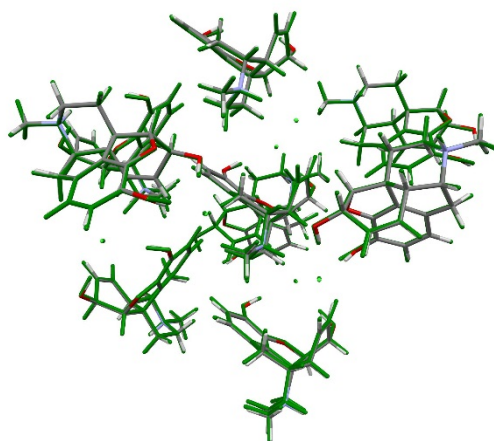

**Figure S29.** Overlay of the 15 molecule cluster of the observed structure of **MCl-I°** (colored by element) and calculated DFT-TS structure (green),  $\text{rmsd}_{15}=0.05 \text{ \AA}$ .

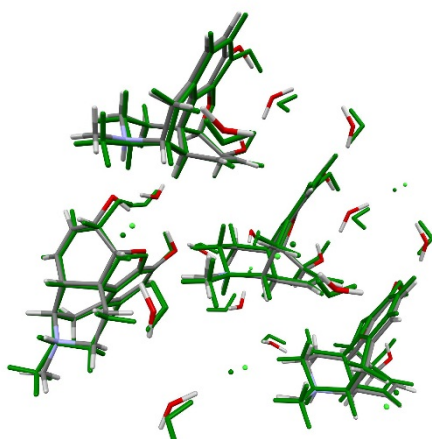

**Figure S30.** Overlay of the 30 molecule cluster of the observed structure of **MCl-3H** (colored by element) and calculated DFT-TS structure (green),  $\text{rmsd}_{30}=0.34 \text{ \AA}$ . For differences see Figure 12.

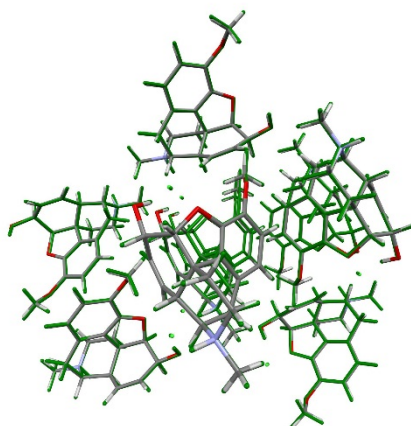

**Figure S31.** Overlay of the 15 molecule cluster of the observed structure of  $\text{CCl-I}^\circ$  (colored by element) and calculated DFT-TS structure (green),  $\text{rmsd}_{15}=0.05 \text{ \AA}$ .

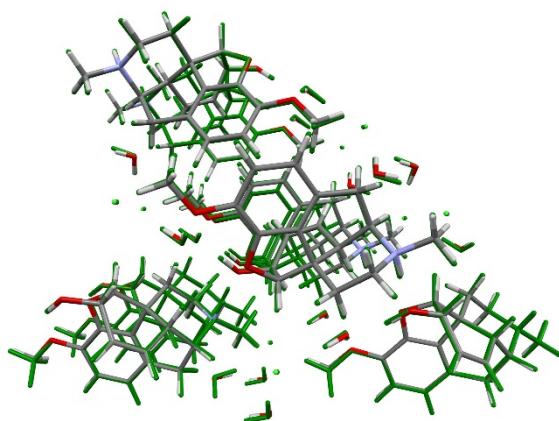

**Figure S32.** Overlay of the 30 molecule cluster of the observed structure of  $\text{CCl-2H}$  (colored by element) and calculated DFT-TS structure (green),  $\text{rmsd}_{30}=0.08 \text{ \AA}$ .

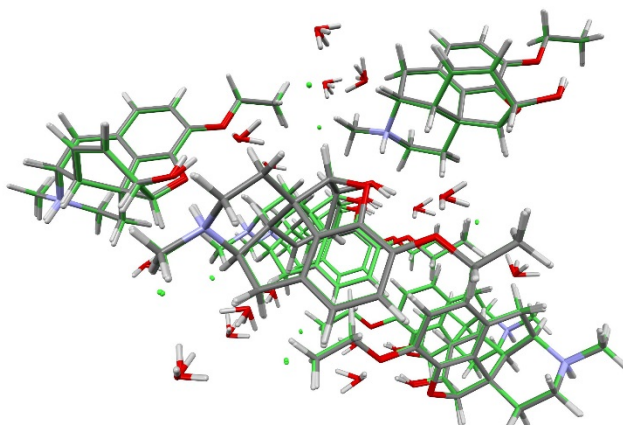

**Figure S33.** Overlay of the 30 molecule cluster of the observed structure of  $\text{DCl-2H}$  (colored by element) and calculated DFT-TS structure (green),  $\text{rmsd}_{30}=0.08 \text{ \AA}$ .

### 13. Computational Dehydration

The lattice energy ( $E_{\text{latt}}$ ) was calculated from the total periodic *ab initio* energy per molecule minus  $E_{\text{gas}}$  (opt). Computationally we can generate hypothetical lower-stoichiometric hydrate and framework (FW) structures by removing water molecule(s). By comparing  $E_{\text{latt}}$  of the hydrate and the  $\text{FW}_{\text{fix}}$  structure (single point calculation, cell and atomic positions fixed) the contribution of the water molecule to the hydrate lattice energy can be estimated. Comparing  $E_{\text{latt}}$  of the hydrate to  $E_{\text{latt}}$  of the optimized FW structure ( $\text{FW}_{\text{opt}}$ ) and ice, and comparing  $E_{\text{latt}}$  of the experimental anhydrate to  $\text{FW}_{\text{opt}}$  can give insights into the likelihood of the existence of an isomorphic desolvate and thus the dehydration mechanism. Details of the computational dehydration calculations are given in Table S24 for the free bases and Table S25 for the HCl salts.

**Table S24.** Computational Dehydration of **M-1H**, **C-1H** and **D-1H**.

| Solid Form <sup>a</sup>                      | a      | b      | c      | density             | $E_{\text{latt}}$ | $\Delta_{\text{dehy}}U_{X-Y}^c$ | $\Delta_{\text{trs}}U_{X-Y}^d$ | X, Y                              |
|----------------------------------------------|--------|--------|--------|---------------------|-------------------|---------------------------------|--------------------------------|-----------------------------------|
|                                              | /Å     |        |        | /g cm <sup>-3</sup> |                   | /kJ mol <sup>-1</sup>           |                                |                                   |
| <b>Morphine (M)</b>                          |        |        |        |                     |                   |                                 |                                |                                   |
| <b>M-1H</b> , 25 K                           | 7.431  | 13.769 | 14.944 | 1.318               | –                 | –                               | –                              | –                                 |
| <b>M-1H</b> <sub>calc</sub>                  | 7.306  | 13.659 | 14.653 | 1.378               | –281.01           | –                               | –                              | –                                 |
| <b>M-FW</b> <sub>fix</sub>                   | 7.306  | 13.659 | 14.653 | 1.296               | –158.33           | +122.69                         | +63.69                         | X=1H, Y= $\text{FW}_{\text{fix}}$ |
| <b>M-FW</b> <sub>opt</sub> (inter)           | 7.129  | 14.067 | 14.329 | 1.319               | –170.92           | +110.09                         | +51.09                         | X=1H, Y= $\text{FW}_{\text{opt}}$ |
| <b>M-FW</b> <sub>opt</sub> (intra)           | 7.246  | 13.712 | 14.596 | 1.307               | –180.59           | +100.42                         | +41.42                         | X=1H, Y= $\text{FW}_{\text{opt}}$ |
| <b>M-I</b> <sup>o</sup> , 173 K              | 7.699  | 12.737 | 13.740 | 1.407               | –                 | –                               | –                              | –                                 |
| <b>M-I</b> <sup>o</sup> <sub>calc</sub>      | 7.671  | 12.612 | 13.655 | 1.435               | –201.18           | +79.83                          | +20.83                         | X=1H, Y=I <sup>o</sup>            |
| <b>Codeine (C)</b>                           |        |        |        |                     |                   |                                 |                                |                                   |
| <b>C-1H</b> , 173 K                          | 10.399 | 12.567 | 12.064 | 1.337               | –                 | –                               | –                              | –                                 |
| <b>C-1H</b> <sub>calc</sub>                  | 10.294 | 12.050 | 12.452 | 1.365               | –246.65           | –                               | –                              | –                                 |
| <b>C-FW</b> <sub>fix</sub>                   | 10.294 | 12.050 | 12.452 | 1.287               | –158.67           | +87.98                          | +28.98                         | X=1H, Y= $\text{FW}_{\text{fix}}$ |
| <b>C-FW</b> <sub>opt</sub> (inter)           | 10.288 | 11.837 | 12.685 | 1.287               | –161.65           | +85.00                          | +26.00                         | X=1H, Y= $\text{FW}_{\text{opt}}$ |
| <b>C-FW</b> <sub>opt</sub> (intra)           | 10.577 | 11.013 | 13.019 | 1.311               | –158.94           | +87.71                          | +28.71                         | X=1H, Y= $\text{FW}_{\text{opt}}$ |
| <b>C-I</b> <sup>o</sup> , 20 K               | 7.335  | 13.647 | 14.735 | 1.348               | –                 | –                               | –                              | –                                 |
| <b>C-I</b> <sup>o</sup> <sub>calc</sub>      | 7.282  | 13.528 | 14.594 | 1.383               | –182.09           | +64.57                          | +5.57                          | X=1H, Y=I <sup>o</sup>            |
| <b>Ethylmorphine (D)</b>                     |        |        |        |                     |                   |                                 |                                |                                   |
| <b>D-1H</b> , 173 K                          | 7.082  | 13.149 | 18.058 | 1.309               | –                 | –                               | –                              | –                                 |
| <b>D-1H</b> <sub>calc</sub>                  | 6.981  | 13.144 | 17.733 | 1.353               | –266.27           | –                               | –                              | –                                 |
| <b>D-FW</b> <sub>fix</sub>                   | 6.981  | 13.144 | 17.733 | 1.279               | –177.26           | +89.01                          | +30.01                         | X=1H, Y= $\text{FW}_{\text{fix}}$ |
| <b>D-FW</b> <sub>opt</sub> (inter)           | 7.344  | 13.183 | 15.868 | 1.355               | –194.98           | +71.30                          | +12.30                         | X=1H, Y= $\text{FW}_{\text{opt}}$ |
| <b>D-FW</b> <sub>opt</sub> (intra)           | 7.097  | 13.258 | 17.477 | 1.266               | –154.08           | +112.19                         | +53.19                         | X=1H, Y= $\text{FW}_{\text{opt}}$ |
| <b>D-I</b> <sup>o</sup> , 298 K <sup>b</sup> | 7.417  | 13.271 | 16.273 | 1.300               | –                 | –                               | –                              | –                                 |
| <b>D-I</b> <sup>o</sup> <sub>calc</sub>      | 7.344  | 13.183 | 15.868 | 1.355               | –194.98           | +71.30                          | +12.30                         | X=1H, Y=I <sup>o</sup>            |

<sup>a</sup>FW – all framework structures are calculated structures, fix – fixed cell, opt – full structure optimization, inter – C-C-O3-H forming an intermolecular hydrogen bond, intra – C-C-O3-H forming an intramolecular hydrogen bond. <sup>b</sup>Cell parameters derived from indexing the PXRD pattern. <sup>c</sup> $\Delta_{\text{dehy}}U_{X-Y} = -E_{\text{latt}(X)} - (-E_{\text{latt}(Y)})$ . <sup>d</sup> $\Delta_{\text{trs}}U_{X-Y} = \Delta_{\text{dehy}}U_{X-Y} - n(-E_{\text{latt}(\text{ice})})$ , with  $n$  corresponding to the difference of water molecules per mol of M/C/D.

**Table S25.** Computational Dehydration of **MCl**, **CCl** and **DCl** Hydrates.

| Solid Form <sup>a</sup>                   | a     | b      | c      | density             | $E_{latt}$ | $\Delta_{dehy}U_{X-Y}^d$ | $\Delta_{trs}U_{X-Y}^e$ | X, Y                                          |
|-------------------------------------------|-------|--------|--------|---------------------|------------|--------------------------|-------------------------|-----------------------------------------------|
|                                           | /Å    |        |        | /g cm <sup>-3</sup> |            | /kJ mol <sup>-1</sup>    |                         |                                               |
| <b>Morphine HCl (MCl)</b>                 |       |        |        |                     |            |                          |                         |                                               |
| <b>MCl-3H, RT</b>                         | 6.941 | 13.019 | 20.750 | 1.331               | –          | –                        | –                       | –                                             |
| <b>MCl-3H<sub>calc</sub></b>              | 6.721 | 13.168 | 20.566 | 1.372               | –959.34    | –                        | –                       | –                                             |
| <b>MCl-2H, RT<sup>b</sup></b>             | 6.937 | 12.452 | 19.819 | 1.388               | –          | –                        | –                       | –                                             |
| <b>MCl-2H-A<sub>fix</sub></b>             | 6.721 | 13.168 | 20.566 | 1.306               | –865.11    | +94.23                   | +35.23                  | X=3H, Y=2H-A <sub>fix</sub>                   |
| <b>MCl-2H-A<sub>opt</sub></b>             | 6.714 | 12.746 | 19.915 | 1.371               | –900.83    | +58.51                   | –0.49                   | X=3H, Y=2H-A <sub>opt</sub>                   |
| <b>MCl-2H-B<sub>fix</sub></b>             | 6.721 | 13.168 | 20.566 | 1.306               | –871.59    | +87.75                   | +28.75                  | X=3H, Y=2H-B <sub>fix</sub>                   |
| <b>MCl-2H-B<sub>opt</sub></b>             | 6.706 | 12.753 | 20.277 | 1.395               | –884.44    | +74.90                   | +15.90                  | X=3H, Y=2H-B <sub>opt</sub>                   |
| <b>MCl-2H-C<sub>fix</sub></b>             | 6.721 | 13.168 | 20.566 | 1.306               | –832.06    | +127.28                  | +68.28                  | X=3H, Y=2H-C <sub>fix</sub>                   |
| <b>MCl-2H-C<sub>opt</sub><sup>c</sup></b> | 6.762 | 12.901 | 19.536 | 1.395               | –913.56    | +45.78                   | –13.22                  | X=3H, Y=2H-C <sub>opt</sub>                   |
| <b>MCl-1H-B<sub>fix</sub></b>             | 6.714 | 12.746 | 19.915 | 1.324               | –821.46    | +79.37                   | +20.37                  | X=2H-B <sub>opt</sub> , Y=1H-B <sub>fix</sub> |
| <b>MCl-1H-B<sub>opt</sub></b>             | 6.753 | 12.493 | 19.554 | 1.368               | –826.54    | +74.29                   | +15.29                  | X=2H-B <sub>opt</sub> , Y=1H-B <sub>opt</sub> |
| <b>MCl-1H-C<sub>fix</sub></b>             | 6.714 | 12.746 | 19.915 | 1.324               | –785.14    | +115.69                  | +56.69                  | X=2H-B <sub>opt</sub> , Y=1H-C <sub>fix</sub> |
| <b>MCl-1H-C<sub>opt</sub><sup>c</sup></b> | 6.946 | 12.531 | 18.274 | 1.419               | –834.06    | +66.77                   | +7.94                   | X=2H-B <sub>opt</sub> , Y=1H-C <sub>opt</sub> |
| <b>MCl-FW<sub>fix</sub></b>               | 6.721 | 13.168 | 20.566 | 1.174               | –665.94    | +160.60                  | +101.60                 | X=1H-C <sub>opt</sub> , Y=FW <sub>fix</sub>   |
| <b>MCl-FW<sub>opt</sub></b>               | 6.801 | 12.106 | 19.148 | 1.356               | –772.50    | +54.03                   | –4.97                   | X=1H-C <sub>opt</sub> , Y=FW <sub>opt</sub>   |
| <b>MCl-I<sup>o</sup>, 173 K</b>           | 7.350 | 12.852 | 16.037 | 1.411               | –          | –                        | –                       | –                                             |
| <b>MCl-I<sup>o</sup><sub>calc</sub></b>   | 7.274 | 12.799 | 16.010 | 1.434               | –805.45    | +153.89                  | –23.11                  | X=3H, Y=I <sup>o</sup>                        |
| <b>Codeine HCl (CCl)</b>                  |       |        |        |                     |            |                          |                         |                                               |
| <b>CCl-2H, 123 K</b>                      | 6.762 | 12.932 | 20.308 | 1.391               | –          | –                        | –                       | –                                             |
| <b>CCl-2H<sub>calc</sub></b>              | 6.677 | 12.895 | 20.261 | 1.416               | –937.74    | –                        | –                       | –                                             |
| <b>CCl-1H-B<sub>fix</sub></b>             | 6.677 | 12.895 | 20.261 | 1.347               | –849.93    | +87.82                   | +28.82                  | X=2H, Y=1H-B <sub>fix</sub>                   |
| <b>CCl-1H-B<sub>opt</sub></b>             | 6.686 | 12.730 | 20.102 | 1.374               | –854.31    | +83.44                   | +24.44                  | X=2H, Y=1H-B <sub>opt</sub>                   |
| <b>CCl-1H-C<sub>fix</sub></b>             | 6.677 | 12.895 | 20.261 | 1.347               | –819.89    | +117.85                  | +58.85                  | X=2H, Y=1H-C <sub>fix</sub>                   |
| <b>CCl-1H-C<sub>opt</sub></b>             | 6.740 | 12.973 | 19.724 | 1.363               | –834.46    | +103.29                  | +44.29                  | X=2H, Y=1H-C <sub>opt</sub>                   |
| <b>CCl-FW<sub>fix</sub></b>               | 6.677 | 12.895 | 20.261 | 1.279               | –721.80    | +128.13                  | +69.13                  | X=1H-C <sub>opt</sub> , Y=FW <sub>fix</sub>   |
| <b>CCl-FW<sub>opt</sub></b>               | 6.724 | 12.742 | 19.432 | 1.340               | –744.54    | +109.77                  | +50.77                  | X=1H-C <sub>opt</sub> , Y=FW <sub>opt</sub>   |
| <b>CCl-I<sup>o</sup>, 173 K</b>           | 7.144 | 13.230 | 16.541 | 1.427               | –          | –                        | –                       | –                                             |
| <b>CCl-I<sup>o</sup><sub>calc</sub></b>   | 7.105 | 13.226 | 16.412 | 1.446               | –798.18    | +139.57                  | +21.57                  | X=2H, Y=I <sup>o</sup>                        |
| <b>Ethylmorphine HCl (DCl)</b>            |       |        |        |                     |            |                          |                         |                                               |
| <b>DCl-2H, 173 K</b>                      | 6.872 | 13.392 | 20.418 | 1.364               | –          | –                        | –                       | –                                             |
| <b>DCl-2H<sub>calc</sub></b>              | 6.775 | 13.302 | 20.247 | 1.405               | –943.41    | –                        | –                       | –                                             |
| <b>DCl-1H-B<sub>fix</sub></b>             | 6.775 | 13.302 | 20.247 | 1.339               | –857.25    | +86.16                   | +27.16                  | X=2H, Y=1H-B <sub>fix</sub>                   |
| <b>DCl-1H-B<sub>opt</sub></b>             | 6.741 | 13.097 | 20.294 | 1.364               | –865.69    | +77.72                   | +18.72                  | X=2H, Y=1H-B <sub>opt</sub>                   |
| <b>DCl-1H-C<sub>fix</sub></b>             | 6.775 | 13.302 | 20.247 | 1.339               | –829.01    | +114.40                  | +55.40                  | X=2H, Y=1H-C <sub>fix</sub>                   |
| <b>DCl-1H-C<sub>opt</sub></b>             | 6.837 | 13.530 | 19.560 | 1.350               | –846.01    | +97.40                   | +38.40                  | X=2H, Y=1H-C <sub>opt</sub>                   |
| <b>DCl-FW<sub>fix</sub></b>               | 6.775 | 13.302 | 20.247 | 1.273               | –735.40    | +121.85                  | +62.85                  | X=1H-C <sub>opt</sub> , Y=FW <sub>fix</sub>   |
| <b>DCl-FW<sub>opt</sub></b>               | 6.749 | 13.285 | 19.848 | 1.305               | –755.72    | +109.96                  | +50.96                  | X=1H-C <sub>opt</sub> , Y=FW <sub>opt</sub>   |
| <b>DCl-I<sub>calc</sub></b>               | 7.241 | 13.950 | 17.571 | 1.309               | –746.46    | +196.95                  | +78.95                  | X=2H, Y=I <sup>o</sup>                        |

<sup>a</sup>RT – room temperature, **MCl-2H-A<sub>opt</sub>** corresponds to **MCl-2H<sub>calc</sub>**, **fix** – fixed cell, **opt** – full structure optimization. <sup>b</sup>Cell parameters derived from indexing the PXRD pattern. <sup>c</sup>Change in structure upon optimization: Cl<sup>–</sup> ion takes place of water molecule (no isostructural structure). <sup>d</sup> $\Delta_{dehy}U_{X-Y} = -E_{latt(X)} - (-E_{latt(Y)})$ . <sup>e</sup> $\Delta_{trs}U_{X-Y} = \Delta_{dehy}U_{X-Y} - n(-E_{latt(ice)})$ , with  $n$  corresponding to the difference of water molecules per mol of **MCl/CCl/DCl**.

## 14. Void space analysis

The computationally generated anhydrate ( $I^\circ$ ), hydrate (3H, 2H, 1H) and framework structures ( $FW_{\text{fix}}$ ,  $FW_{\text{opt}}$ ) were subjected to void space calculations using a 1 Å probe radius and an approximate grid spacing of 0.1 Å using Mercury (Table S26 and S27).

**Table S26.** Void space calculations of **M**, **C** and **D** structures with water molecules removed.

| Compound | $I^\circ$ | 1H        | $FW_{\text{fix}}^a$           | $FW_{\text{opt}}$ |
|----------|-----------|-----------|-------------------------------|-------------------|
|          |           |           | Void Space / %/Å <sup>3</sup> |                   |
| <b>M</b> | 0/0       | 3.6/53.11 | 6.4/93.59 (2.8/40.48)         | 5.9/85.29         |
| <b>C</b> | 0/0       | 0/0       | 7.0/107.03                    | 7.0/107.53        |
| <b>D</b> | –         | 1.7/28.0  | 7.0/113.74 (5.3/85.74)        | 0/0               |

<sup>a</sup>Values in parenthesis are calculated as void space of FW minus void space of 1H.

**Table S27.** Void space calculations for **MCl**, **CCl** and **DCl** structures with water molecules partially and completely removed.

| Cpd        | $I^\circ$ | 3H        | 2H                                          | 1H                           | $FW_{\text{fix}}$ | $FW_{\text{opt}}$ |
|------------|-----------|-----------|---------------------------------------------|------------------------------|-------------------|-------------------|
|            |           |           |                                             |                              |                   |                   |
| <b>MCl</b> | 0/0       | 1.4/24.95 | A: 1.0/23.41<br>B: 2.4/41.92<br>C: 0.4/7.07 | B: 5.3/88.18<br>C: 2.3/36.03 | 16.3/297.13       | 9.7/152.97        |
| <b>CCl</b> | 0/0       | –         | 0/0                                         | B: 2.8/48.50<br>C: 5.7/96.86 | 8.0/39.91         | 6.1/101.92        |
| <b>DCl</b> | 1.7/30.58 | –         | 0/0                                         | B: 5.1/91.75<br>C: 5.5/98.81 | 9.6/175.88        | 9.2/164.42        |

## 15. Computationally Generated D-I° Structure

The .res file for the computationally generated D-I° is given:

```
TITL Dionine_AH_DFT
CELL 1.54180 7.3439 13.1829 15.8681 90.000 90.000 90.000
ZERR 4 0.0000 0.0000 0.0000 0.000 0.000 0.000
LATT -1
SYMM 0.50000 - X, - Y, 0.50000 + Z
SYMM 0.50000 + X, 0.50000 - Y, - Z
SYMM - X, 0.50000 + Y, 0.50000 - Z
SFAC C H N O
C1 1 0.12324 0.50758 0.50005 11.00000 0.0500
C2 1 0.11508 0.61271 0.48964 11.00000 0.0500
C3 1 0.19620 0.66122 0.42031 11.00000 0.0500
C4 1 0.27931 0.59834 0.36082 11.00000 0.0500
C5 1 0.48009 0.53750 0.26464 11.00000 0.0500
C6 1 0.67729 0.53949 0.30284 11.00000 0.0500
C7 1 0.71133 0.46260 0.37042 11.00000 0.0500
C8 1 0.61921 0.37600 0.37916 11.00000 0.0500
C9 1 0.31581 0.28300 0.36720 11.00000 0.0500
C10 1 0.23540 0.33329 0.44722 11.00000 0.0500
C11 1 0.20400 0.44552 0.43913 11.00000 0.0500
C12 1 0.22364 0.41459 0.22644 11.00000 0.0500
C13 1 0.08720 0.33941 0.26190 11.00000 0.0500
C14 1 0.46168 0.34989 0.32364 11.00000 0.0500
C15 1 0.27290 0.49420 0.36889 11.00000 0.0500
C16 1 0.36364 0.44634 0.29367 11.00000 0.0500
C17 1 0.04331 0.18115 0.33452 11.00000 0.0500
C18 1 0.09300 0.82583 0.46239 11.00000 0.0500
C19 1 0.11780 0.93460 0.43560 11.00000 0.0500
H1 2 0.74263 0.68305 0.28347 11.00000 -1.50000
H2 2 0.06675 0.47410 0.55728 11.00000 -1.20000
H3 2 0.15085 0.48139 0.20250 11.00000 -1.20000
H4 2 0.29690 0.38071 0.17287 11.00000 -1.20000
H5 2 0.82788 0.47995 0.41050 11.00000 -1.20000
H6 2 0.51109 0.30635 0.26867 11.00000 -1.20000
H7 2 0.48835 0.54358 0.19572 11.00000 -1.20000
H8 2 0.38177 0.21168 0.38696 11.00000 -1.20000
H9 2 -0.00553 0.37800 0.30633 11.00000 -1.20000
H10 2 0.00099 0.30780 0.21185 11.00000 -1.20000
H11 2 0.76755 0.51779 0.24954 11.00000 -1.20000
H12 2 0.25379 0.96252 0.45170 11.00000 -1.50000
H13 2 0.09820 0.94268 0.36749 11.00000 -1.50000
H14 2 0.01735 0.98210 0.46809 11.00000 -1.50000
H15 2 0.66039 0.32171 0.42749 11.00000 -1.20000
H16 2 -0.05939 0.21618 0.37627 11.00000 -1.50000
H17 2 0.11115 0.11992 0.36909 11.00000 -1.50000
H18 2 -0.03050 0.14878 0.28073 11.00000 -1.50000
H19 2 0.13237 0.81632 0.52889 11.00000 -1.20000
H20 2 -0.04927 0.80139 0.45465 11.00000 -1.20000
H21 2 0.10948 0.29379 0.46550 11.00000 -1.20000
H22 2 0.33080 0.32003 0.49972 11.00000 -1.20000
H23 2 0.04754 0.65827 0.53759 11.00000 -1.20000
N1 3 0.17868 0.25313 0.30321 11.00000 0.0500
O1 4 0.37701 0.62782 0.29111 11.00000 0.0500
O2 4 0.20581 0.76348 0.40841 11.00000 0.0500
O3 4 0.72862 0.63612 0.33350 11.00000 0.0500
END
```

## 16. Computationally Generated MCI-2H

The .res file for the computationally generated MCI-2H is given:

```
TITL MCI_DH
CELL 1.54180 6.7143 12.7463 19.9152 90.000 90.000 90.000
ZERR 4 0.0000 0.0000 0.0000 0.000 0.000 0.000
LATT -1
SYMM 0.50000 - X, - Y, 0.50000 + Z
SYMM 0.50000 + X, 0.50000 - Y, - Z
SYMM - X, 0.50000 + Y, 0.50000 - Z
SFAC C H Cl N O
C1 1 0.99269 0.33819 0.47379 11.00000 0.0500
C2 1 1.00181 0.23001 0.46333 11.00000 0.0500
C3 1 0.91824 0.18295 0.40627 11.00000 0.0500
C4 1 0.84274 0.25120 0.35802 11.00000 0.0500
C5 1 0.65029 0.31633 0.27267 11.00000 0.0500
C6 1 0.42469 0.30703 0.28573 11.00000 0.0500
C7 1 0.36404 0.34923 0.35296 11.00000 0.0500
C8 1 0.44170 0.43795 0.37734 11.00000 0.0500
C9 1 0.72839 0.56934 0.38141 11.00000 0.0500
C10 1 0.84532 0.51772 0.43914 11.00000 0.0500
C11 1 0.90201 0.40496 0.42684 11.00000 0.0500
C12 1 0.90061 0.46671 0.26307 11.00000 0.0500
C13 1 1.00834 0.55531 0.29872 11.00000 0.0500
C14 1 0.60237 0.49320 0.33861 11.00000 0.0500
C15 1 0.84250 0.35834 0.36754 11.00000 0.0500
C16 1 0.74698 0.41139 0.30835 11.00000 0.0500
C17 1 0.96663 0.71956 0.36300 11.00000 0.0500
H1 2 0.77908 0.05826 0.37989 11.00000 -1.50000
H2 2 0.42617 0.15140 0.30358 11.00000 -1.50000
H3 2 0.76906 0.65797 0.29445 11.00000 -1.20000
H4 2 1.05923 0.37028 0.51919 11.00000 -1.20000
H5 2 0.74783 0.52155 0.48358 11.00000 -1.20000
H6 2 0.97571 0.56537 0.45270 11.00000 -1.20000
H7 2 0.53294 0.54007 0.29815 11.00000 -1.20000
H8 2 1.01369 0.41025 0.24619 11.00000 -1.20000
H9 2 0.82629 0.49605 0.21758 11.00000 -1.20000
H10 2 1.09503 0.60290 0.26341 11.00000 -1.20000
H11 2 1.10951 0.52580 0.33762 11.00000 -1.20000
H12 2 1.04410 0.76110 0.32274 11.00000 -1.50000
H13 2 0.85444 0.77072 0.38575 11.00000 -1.50000
H14 2 1.07574 0.69338 0.40020 11.00000 -1.50000
H15 2 1.06694 0.17947 0.50149 11.00000 -1.20000
H16 2 0.67467 0.31551 0.21819 11.00000 -1.20000
H17 2 0.35373 0.35410 0.24569 11.00000 -1.20000
H18 2 0.24832 0.30691 0.37995 11.00000 -1.20000
H19 2 0.39030 0.47160 0.42470 11.00000 -1.20000
H20 2 0.63155 0.63075 0.40201 11.00000 -1.20000
Cl1 3 0.51571 0.32629 0.09927 11.00000 0.0500
N1 4 0.86350 0.62763 0.33256 11.00000 0.0500
O1 5 0.75094 0.22238 0.29904 11.00000 0.0500
O2 5 0.91075 0.07609 0.39969 11.00000 0.0500
O3 5 0.35465 0.20250 0.27436 11.00000 0.0500
H21 2 0.57857 0.58305 0.09859 11.00000 -1.50000
H22 2 0.51609 0.47420 0.12787 11.00000 -1.50000
O4 5 0.50257 0.55261 0.13579 11.00000 0.0500
H23 2 0.78550 0.14374 -0.01971 11.00000 -1.50000
H24 2 0.64889 0.19886 0.03433 11.00000 -1.50000
O5 5 0.69867 0.12977 0.01942 11.00000 0.0500
END
```

## Reference List

1. Gelbrich, T.; Hursthouse, M. B. *CrystEngComm* **2005**, *7*, 324-336.
2. Gelbrich, T.; Threlfall, T. L.; Hursthouse, M. B. *CrystEngComm* **2012**, *14*, 5454-5464.
3. Gelbrich, T.; Braun, D. E.; Griesser, U. J. *Acta Crystallogr. , Sect. E: Struct. Rep. Online* **2012**, *E68*, o3358-o3359.
4. Gelbrich, T.; Braun, D. E.; Griesser, U. J. *Acta Crystallogr. , Sect. E: Struct. Rep. Online* **2013**, *69*, o2.
5. Scheins, S.; Messerschmidt, M.; Luger, P. *Acta Crystallogr. B* **2005**, *61*, 443-448.
6. Scheins, S.; Messerschmidt, M.; Morgenroth, W.; Paulmann, C.; Luger, P. *J. Phys. Chem. A* **2007**, *111*, 5499-5508.
7. Gylbert, L. *Acta Crystallogr., Sect. B* **1973**, *29*, 1630-1635.
8. *Gaussian 09*, Frisch, M. J.; Trucks, G. W.; Schlegel, H. B.; Scuseria, G. E.; Robb, J. M. A.; Cheeseman, R.; Scalmani, G.; Barone, V.; Mennucci, B.; Petersson, G. A.; Nakatsuji, H.; Caricato, M.; Li, X.; Hratchian, H. P.; Izmaylov, A. F.; Bloino, J.; Zheng, G.; Sonnenberg, J. L.; Hada, M.; Ehara, M.; Toyota, K.; Fukuda, R.; Hasegawa, J.; Ishida, M.; Nakajima, T.; Honda, Y.; Kitao, O.; Nakai, H.; Vreven, T.; Montgomery, J. A.; Peralta, J. E.; Ogliaro, F.; Bearpark, M.; Heyd, J. J.; Brothers, E.; Kudin, K. N.; Staroverov, V. N.; Kobayashi, R.; Normand, J.; Raghavachari, K.; Rendell, A.; Burant, J. C.; Iyengar, S. S.; Tomasi, J.; Cossi, M.; Rega, N.; Millam, J. M.; Klene, M.; Knox, J. E.; Cross, J. B.; Bakken, V.; Adamo, C.; Jaramillo, J.; Gomperts, R.; Stratmann, R. E.; Yazyev, O.; Austin, A. J.; Cammi, R.; Pomelli, C.; Ochterski, J. W.; Martin, R. L.; Morokuma, K.; Zakrzewski, V. G.; Voth, G. A.; Salvador, P.; Dannenberg, J. J.; Dapprich, S.; Daniels, A. D.; Farkas; Foresman, J. B.; Ortiz, J. V.; Cioslowski, J.; Fox, D. J. Gaussian Inc.: Wallingford CT, **2009**
